# The calcifying interface in a stony coral's primary polyp: An interplay between seawater and an extracellular calcifying space

Gal Mor Khalifa<sup>12\*</sup>, Shani Levy<sup>12</sup> and Tali Mass<sup>12\*</sup>

1. Department of Marine Biology, Leon H. Charney School of Marine Sciences, University of Haifa, Mt. Carmel, Haifa 3498838, Israel
2. Morris Kahn Marine Research Station, The Leon H. Charney School of Marine Sciences, University of Haifa, Sdot Yam, Israel.

\*Corresponding authors: Gal Mor Khalifa [galmor26@gmail.com](mailto:galmor26@gmail.com) and Tali Mass [tmass@univ.haifa.ac.il](mailto:tmass@univ.haifa.ac.il)

## Abstract

Stony coral exoskeletons build the foundation to the most biologically diverse yet fragile marine ecosystems on earth, coral reefs. Understanding corals biomineralization mechanisms is therefore crucial for coral reef management and for using coral skeletons in geochemical studies. In this study, we combine in-vivo and cryo-electron microscopy with single-cell RNA-seq data to gain novel insights into the calcifying micro-environment that facilitates biomineralization in primary polyps of the stony coral *Stylophora pistillata*. We show an intimate involvement of seawater in this micro-environment. We further document increased tissue permeability and a highly dispersed cell packing in the tissue secreting the coral skeleton (i.e. calcicoblastic). We also observe an extensive filopodial network containing carbon-rich vesicles extruding from some of the calcicoblastic cells. Single-cell RNA-Seq data interrogation shows that calcicoblastic cells express genes involved in filopodia and vesicle structure and function. These observations provide a new conceptual framework for resolving stony corals biomineralization processes.

## Introduction

Coral reefs are highly biodiverse ecosystems (1–3). Stony corals inhabiting these ecosystems produce calcium carbonate exoskeletons which, on geological time scales, can lead to the formation of massive coral reefs spanning thousands kilometers in shallow tropical and subtropical seas (4, 5). Coral reef ecosystems around the world are facing major threats due to multiple global anthropogenic stressors including sea surface warming and ocean

33 acidification, and local anthropogenic stressors such as overfishing, pollution, marine  
34 construction and diving pressure (6–11). Coral reef risk assessment is a highly complex task,  
35 not only because of the multiple stressors involved, but also due to the lack of mechanistic  
36 understanding of some physiological processes in corals, including how they build their  
37 exoskeletons. Coral skeletogenesis is a biologically controlled process performed by the coral  
38 animal. Therefore, corals can respond to and compensate for environmental changes such as  
39 ocean acidification to some extent (12). It is also reported that some coral reef ecosystems are  
40 more resistant than others to episodic sea surface warming (13). A major missing link for  
41 predicting the degree of stony coral resilience to environmental changes is the understanding  
42 of the basic mechanisms, at the tissue, cellular and molecular levels, by which corals calcify.  
43 Stony coral skeletons are made of calcium carbonate almost entirely of the polymorph  
44 aragonite (14, 15). The elemental and isotopic compositions of the aragonitic coral skeletons  
45 record the external seawater chemistry in which they were formed, but with an offset due to  
46 the biological control of the coral animal over this biomineralization process. This offset is  
47 consistent within individual species and termed the vital effect e.g. (16). Coral skeletons are  
48 therefore, used for reconstructing recent and past ocean chemistry and climate (16). Resolving  
49 the biomineralization process in stony corals is therefore, essential for better understanding  
50 the use of coral skeleton elemental and isotopic composition for ocean chemistry  
51 reconstructions, as well as for assessing coral reef fate under current and future climate  
52 conditions (17).

53 Most scleractinian or stony corals (Anthozoa) form colonies with the basic unit of a polyp. A  
54 coral's life cycle involves a swimming planula which metamorphoses, settles and  
55 immediately commences rapid calcification in order to attach firmly to the substrate and to  
56 form the primary polyp (18). Polyps have a cylindrical shape with a central mouth surrounded  
57 by tentacles used for predation (Fig 1a, e). Many stony corals also  
58 contain symbiotic dinoflagellates of the family Symbiodiniaceae (19) and feed both by  
59 predation and on photosynthetic products supplied by their endosymbionts (20). Coral  
60 anatomy includes two body layers, an ectoderm and an endoderm, separated with a non-  
61 cellular gelatinous layer called mesoglea. This anatomy repeats itself in the oral tissue that  
62 faces the external seawater, and in the aboral tissue that faces the exoskeleton (4, 21, 22). The  
63 oral ectoderm contains stinging cells (nematocytes) which play a role in predation and defense  
64 while the aboral ectoderm contains calciblastic cells responsible for secreting the  
65 mineralized exoskeleton within the extra-cellular medium (ECM) (4, 22). The skeleton of an  
66 individual polyp (the cup-shaped portion of the skeleton called a corallite) is composed of

67 radially aligned plates (septa) projecting upwards from the base (Fig 1a, b). Each septum  
68 micro-structure includes the first-formed center of calcification (CoC) characterized by a  
69 nano-granular texture, while the rest of the septum is composed of fibrous elongated  
70 micron-sized single crystals arranged in a three-dimensional fan around the CoC (14, 23–25).  
71 The calicoblastic cell layer, the ECM and the exoskeletal mineral surface together create the  
72 micro-environment in which coral biomineralization occurs. Detailed characterization of this  
73 micro-environment is essential for resolving the biomineralization strategies in stony corals.  
74 Morphological and spatial characterization of the calicoblastic cell layer and the ECM have  
75 been obtained over the past few decades largely using conventional scanning electron  
76 microscopy (SEM), transmission electron microscopy (TEM) thin sections and histology in  
77 several stony coral species (22, 26, 27). However, as with all biological samples, these tissues  
78 are predominately composed of water-based solutions, the characterization of which is  
79 problematic using the above techniques. The native state volume and chemical composition  
80 of water-based solutions cannot be accurately characterized using the above techniques  
81 because of multiple solution exchange steps involved in the preparation procedures in which  
82 the native water-based solutions are effectively removed from the sample and replaced with  
83 preparative agents. Furthermore, chemical fixation, demineralization, staining, dehydration,  
84 and plastic or paraffin embedding involved in the preparation procedures may result in further  
85 morphological alterations of the tissue (28). In contrast, advances in cryo-fixation and cryo-  
86 electron microscopy (cryo-EM) techniques in recent years allow for observation of fully  
87 hydrated biological samples without the need of chemical fixation or staining. Great strides  
88 have been made in morphologic and spectroscopic analysis of cryo-preserved biological  
89 specimens since the first low temperature imaging of coral tissue and skeleton fragments in  
90 2002 (28). This includes the use of high-pressure freezing as a cryo-fixation technique, which  
91 keeps the water molecules of the sample in a non-crystalline amorphous solid state, i.e.,  
92 ‘vitrified’. This is due to the very short duration of this freezing procedure (milliseconds)  
93 allowed by the high-pressure conditions, which leaves no time for ice crystals to form within  
94 the sample (at least not to a size larger than a few nm, which is the spatial resolution of  
95 cryo-SEM imaging). Ice crystals formed during longer freezing procedures can change both  
96 the structure and local chemical composition of the sample. Therefore a high-pressure frozen  
97 sample that is imaged using cryo-SEM more closely represents in-vivo conditions than  
98 alternative techniques mentioned above (29, 30). Cryo-EM also allows both a large imaged  
99 field of view and high-resolution subcellular morphological characterization of the sample  
100 (31, 32). When coupled with cryo-planing this preparation technique further provides a

101 sample surface ideal for cryo-elemental analysis (cryo-energy dispersive x-ray spectroscopy-  
102 cryo-EDS). Cryo-SEM/EDS is one of only a few techniques available today that allows  
103 in-situ elemental analysis of soft tissues and their water-based solution components (33, 34)  
104 in addition to the widely characterized elemental composition of the hard mineralized coral  
105 exoskeleton (35, 36). We therefore adopted cryo-SEM/EDS analysis to characterize the  
106 calcifying tissue-mineral interface in this study.

107 Another cutting-edge technique recently applied for the first time in stony corals is single cell  
108 RNA sequencing (scRNA-seq) (37), which reveals cellular specialization in stony corals. The  
109 new *S. pistillata* cell atlas shows the transcriptional profile of the calicoblastic cells, among  
110 other cell types, in the primary polyp (37) and thus, provides insights into the molecular basis  
111 of the biomineralization processes carried out by these cells. Over 800 genes were found to  
112 be specific to the calicoblastic cells including those associated with biomineralization. Such  
113 as, carbonic anhydrase facilitating the inter-conversion of  $\text{CO}_2$  to  $\text{HCO}_3^-$  and  $\text{HCO}_3^-$   
114 transporters (Fig. S1 (37)), and acid rich proteins found in the coral skeletal proteomes (38–  
115 41). The recent scRNA-seq analysis of multiple *S. pistillata* life stages also showed that 30%  
116 of the primary polyp cells are calicoblasts, while adult colonies are comprised of less than 7%  
117 calicoblasts cells (37). In addition, the authors reported an increased expression of  
118 biomineralization related genes in primary polyps compared with adults (Fig. S1 and (37)),  
119 likely supporting the assumption that mineralization activity is more rapid in the primary  
120 polyp stage compared the adult life stage (18, 21). This makes primary polyps useful targets  
121 of study to characterize the mineralization micro-environment and are therefore the subjects  
122 of this study.

123 Primary polyps (Fig 1. a, e) were high-pressure frozen and the mineral and its adjacent tissue  
124 were exposed for cryo-SEM/EDS analysis using either freeze-fracture to obtain topographic  
125 representation of the tissue (32), or cryo-planing (Fig. 1 b,c and d) to reveals the internal  
126 content of cells and intracellular structures for both imaging (cryo-SEM) and quantitative  
127 elemental analysis (cryo-EDS) (33, 34). We combine these observations with in-vivo  
128 dynamic fluorescence imaging and further used and re-analyzed the recently published  
129 calicoblasts transcriptional profile (37) as complementary data to our structural and elemental  
130 analyses. Our combination of two cutting-edge techniques, cryo-SEM/EDS and scRNA-seq  
131 analysis and in-vivo imaging, allows for the novel description of the micro-environment in  
132 which coral biomineralization occurs and the cells that execute this process. It also provides  
133 new insight into the mechanism of biomineralization and a conceptual framework to resolve  
134 the involvement of external seawater in this process. The latter is key for understanding the

135 use of coral skeletons for reconstructing past ocean chemistry as well as for understanding  
136 the impact of current changes in ocean chemistry on the survival of stony corals as individuals  
137 and of coral reefs as a whole.

## 139 **Results**

### 140 **Morphological characterization of primary polyp tissues using cryo-SEM**

141 Primary polyps were studied 4-5 days after settlement. At this life stage, the primary polyp is  
142 adhered to the substrate, tentacles have formed and can be extended by the animal (Fig. 1a)  
143 and skeletogenesis is at its early stages in the sessile organism. The basal part of the primary  
144 polyp skeleton, termed the ‘basal plate’, is not yet formed (Fig 1a), and septa are often not  
145 fully developed, appearing non-continuous by conventional light microscopy (Fig. 1 e,f). A  
146 cryo-SEM energy-selective back scattered electron (ESB) mode image of a high-pressure-  
147 frozen, freeze-fractured primary polyp reveals the septum with non-continuous mineral  
148 surfaces spread along its long axis (Fig. 1g). Mineral surfaces are detectable with higher  
149 contrast (white) than adjacent tissue (grey) using the ESB detector that is sensitive to electron  
150 density. We used the fluorescent probe calcein to confirm that studied primary polyps were  
151 indeed depositing new mineral to thicken their septa at the time of cryo-fixation. Calcein is a  
152 cell impermeable dye (as oppose to the permeable version of this dye, calcein-AM) which  
153 when applied in the seawater is incorporated into the newly formed mineral and labels it (42).  
154 Primary polyps were labeled in-vivo with calcein blue and imaged both in-vivo (Fig. 1 h, i)  
155 and after cryo-fixation and freeze fracturing by cryo-fluorescence using a confocal laser  
156 scanning microscope combined with a cryo-stage (Fig. 1j). In both in-vivo and cryo-  
157 fluorescence images a thin calcein blue layer is observed lining the external septa surfaces,  
158 indicative of newly formed mineral which was deposited during the labeling period. In the  
159 freeze-fractured cryo-fluorescence image, the bulk internal part of the fractured mineral  
160 surfaces appears black due to the absence of any fluorescence labeling inside the skeleton  
161 while newly formed calcein labeled layer is observed only at the periphery of the fractured  
162 surface.

163 Studying the freeze-fractured surface of primary polyps, we observed characteristic cells of  
164 the oral tissue such as nematocysts, mucus forming cells (mucocytes) and host cells  
165 containing symbiotic algae (Supplementary Fig. S1) (22, 43) . We further observe the  
166 traditionally classified two body layers (22) of the aboral tissue adjacent with the mineral (Fig  
167 2a). The mineral is indicated by its micro-crystalline structure (Fig. 2b) whereas both aboral

168 body layers are indicated by their cellular composition in which nuclei and cellular  
169 membranes are clearly detected (Fig. 2c), and the non-cellular mesoglea separating them is  
170 identified by its rough surface texture (Fig 2d) characteristic of a vitrified solution (Appendix  
171 A figure S5 in 33). It is noteworthy that not all observed areas are characterized with this  
172 classical tissue arrangement. Similar to the reduction of tissue layers near a skeletal spine  
173 observed by Tambutte et al. (26) in which the authors found only two ectodermal layers  
174 separated by mesoglea with no endodermal layers, in some of our observed loci nematocytes  
175 were found in close proximity with the mineral (Supplementary Fig. S2).

176 The freeze-fractured surface of a septum (Fig. 3) reveals the micro-structure of the first  
177 formed mineralization zone, the CoC (Fig. 3c, f pseudo-orange), characterized by a  
178 nano-granulated surface texture composed of tightly packed nano-spheres of a uniform size  
179 of  $20 \pm 3.1$  nm (Fig. 3h). Such surface texture may implies its formation via an amorphous  
180 calcium carbonate (ACC) precursor (44). The remainder of the septum is composed of  
181 elongated fibrous micro-crystals arranged in a three-dimensional fan around the CoC (Fig 3c,  
182 f pseudo-yellow). The interface between the CoC and the micro-crystals layer is better  
183 observed in a newly formed septum where the CoC is already completed but the fibrous  
184 micro-crystals are just starting to form (Fig. 3 d, e, f). The fibrous micro-crystals have a flat  
185 surface and resemble single aragonite crystals as also reported in (23), sized up to 1  $\mu$ m in  
186 width and a few microns in length, (Fig. 3f, g). The two mineral layers appear to be tightly  
187 inter-grown.

188 The calicoblastic cell layer shows various thicknesses, ranging between a monolayer of  
189 calicoblastic cells and a layer with a thickness of 4-5 stacked calicoblastic cells. Cell  
190 morphology in this layer varies as well (Fig. 4). Some cells of the calicoblastic layer exhibit  
191 an elliptical shape (Fig. 4a). Other cells found in close proximity with the mineral surface  
192 typically have an elongated morphology with increasing surface area on the side in contact  
193 with the mineral (Fig. 4b). Near mineral corners or sharp edges, calicoblastic cells typically  
194 have a cup shape (Fig. 4c), as also reported in earlier studies (26). Additionally, many of the  
195 observed calicoblastic cells have cellular extensions which appear to be a filopodia network  
196 (45, 46) that spans up to several cell diameters and typically occupy the space between the  
197 calicoblastic cell layer and the mineral (Fig. 4a). These filopodia are enriched with vesicles  
198 engulfed by the cell membrane (Fig. 4a,d) similar to vesicles documented in the calicoblastic  
199 layer of stony corals in previous studies, sometimes referred as secretory vesicles (18, 47),  
200 spherical extracellular material (21) or intracellular vesicles (28). High magnification cryo-

SEM analysis of a cryo-planed primary polyp reveals the filopodia cross section and shows that the vast majority of the vesicles are found between two filopodia membranes and thus are intracellular rather than occupying the extracellular space (Fig 4d). Cryo-ESB images of the same area show that the vesicles do not have an increased electron density and therefore presumably do not contain a solid mineral or dense cation storage (Fig. 4e). Cryo-SEM/EDS analysis of calicoblastic cells found in close proximity with the septum (Fig. 5) shows that some, but not all, intracellular vesicles are enriched in carbon content compared with the cell cytoplasm and surrounding tissue. This includes both vesicles found within the calicoblastic cell body (Fig. 5b, c, d) and vesicles within filopodia (Fig. 5e, f, g). These observations were consistent across all imaged septa of six freeze-fractured or cryo-planed primary polyps.

### **Paracellular space in the calicoblastic layer**

Moving up scale from cellular morphology to tissue arrangement of the calicoblastic cell layer, we obtained a large high-resolution overview image of the micro-environment around one septum (Fig. 6a) also imaged in figure 5 (Fig. 5a- white arrow and Fig. 5e, f, and g). This overview image reveals a highly dispersed packing of calicoblastic cells (Fig. 6a pseudo-burgundy) adjacent to the septum with micrometer-sized spaces between adjacent cell bodies (Fig. 6a black dashed line). The ECM fluid occupying the space between the septum and its neighboring cells is inter-connected with these paracellular spaces (Fig. 6a pseudo-blue). Calicoblastic cells become more tightly packed moving away from the septum and into the tissue, where we observed paracellular spaces of tens of nm (Fig. 6a white arrowhead top right corner). The ECM and paracellular spaces also contain a massive filopodia network (Fig. 6a pseudo-pink) extruding tens of microns away from the calicoblastic cells bodies (Fig. 6a pseudo-burgundy) from which they are derived, towards the septum and containing a large amount of vesicles (asterisk) with an average size of  $400 \pm 100$  nm (N=100). The elaborated calicoblastic cell filopodial network we observed using cryo-SEM imaging is also correlated with the recently published scRNA-seq data of *S. pistillata* primary polyps of the same age (37). Analysis of the RNA-seq data shows enrichment of membrane and actin-based cell projections and transport vesicle membrane Gene Ontology (GO) terms associated with calicoblastic cells of the primary polyp. Moreover, calicoblastic cells of the primary polyps show high expression (compared with other cell types) of genes involved in filopodia network formation and function such as actins, actin bundling proteins (e.g., fascin), actin binding proteins (e.g., formins) and Arp2/3 proteins known to play essential roles in the regulation of filopodia generation (48) (Fig. 6b). In addition, we found relatively high expression of genes

234 related to vesicular transport, exocytosis and the SNARE complex such as clathrin, synapto  
235 tagmins, and Ras-related proteins (RAPs)(49, 50) which correlates with the large amount of  
236 vesicles observed within the filopodia network (Fig. 6b).

### 237 **Tissue permeability of primary polyps**

238 Cryo-SEM imaging of cryo-planed specimens has an inherent tradeoff between high  
239 resolution and a larger field of view, which does not allow us to obtain a continuous image  
240 that follows the dimensions of the paracellular spaces or the paracellular pathway all the way  
241 from the septum to the external seawater (a distance of few hundreds  $\mu\text{m}$ ). However, we  
242 studied the overall tissue permeability, i.e. from the external seawater inwards to the primary  
243 polyp body using fluorescent beads labeling followed by in-vivo imaging. Previous studies  
244 on adult *S. pistillata* micro-colonies show that beads of sizes larger than 20 nm do not pass  
245 through the oral epithelial layers of the micro-colonies (42). We therefore conducted an  
246 in-vivo labeling experiment on primary polyps using green fluorescent beads of a larger  
247 diameter (1  $\mu\text{m}$ ) in order to check their tissue permeability and to test our assumption that  
248 primary polyps have higher tissue permeability than adult micro-colonies based on the  
249 dispersed tissue arrangement we observed in their calciblastic cell layer. Indeed, after only  
250 2 hr of incubation with seawater solution containing the green fluorescent beads, the beads  
251 were observed inside the primary polyp tissue, as detected in a z-stack of the entire primary  
252 polyp obtained using in-vivo laser scanning confocal imaging (Fig. 6c). This supports the  
253 notion that tissue permeability is indeed significantly higher in the *S. pistillata* primary polyp  
254 than previously documented in corals using adult colonies of the same species (42).

### 255 **ECM thickness and elemental composition**

256 We further observe that the thickness of the ECM layer is highly variable and changes in  
257 space and time in the primary polyp. In-vivo laser scanning time-lapse imaging shows a  
258 contraction and expansion movement of the ECM layer near all forming septa of the primary  
259 polyp that changes the thickness of the ECM layer facing the septum every few min (see  
260 supplementary video S3). The measured ECM thickness at one locus near the septum changes  
261 from 27  $\mu\text{m}$  to 43  $\mu\text{m}$  within 3 min and back to 18  $\mu\text{m}$  within the next 3 min (Fig. 7a-d). This  
262 contraction movement is similar to the ECM pocket contraction movement documented in *A.*  
263 *digitifera* primary polyps (51). High-resolution cryo-SEM collage shows variable ECM layer  
264 thicknesses along a septum surface ranging from several nm and up to tens of  $\mu\text{m}$  (Fig. 7e).  
265 We refer to areas with a thick ECM layer bounded by loci of ECM narrowing on either side



266 as ‘ECM pockets’ because, together with the septum surface, these areas create semi-  
267 delimited ECM spaces. We further used quantitative cryo-SEM/EDS analysis of a cryo-  
268 planed primary polyp specimen to study the elemental composition of the ECM (Fig. 8).  
269 While natural distribution of major seawater ions is well-documented in the coral skeleton  
270 using electron probe, ICP-OES, ICP-MS (36, 52–55) or dry SEM/EDS (56, 57),  
271 cryo-SEM/EDS is one of the few cutting edge techniques that allows in-situ detection and  
272 imaging of the distribution of these ions in the soft tissue, ECM, and skeleton at the same  
273 time. The above technique allows identification of ions in vitrified solutions down to  
274 concentrations of a few tens of mM and quantification of ion ratios in the solution (33). The  
275 major element in both the ECM and the cytoplasm is oxygen which is abundant in water-  
276 based solutions (33) (Fig. 8b, d). The cryo-EDS spectrum of the ECM also show increased  
277 levels of Na and Cl compared with the cytoplasm of calicoblastic cells in which Na and Cl  
278 are not detected (Fig. 8b, e and f). The latter is expected due to the fact that cellular  
279 concentrations of Na (12 mM) and Cl (10 mM) (58) are below the detection limits of this  
280 technique which are 25-50 mM and 73-50 mM, respectively (33). The mineral is easily  
281 differentiated from the soft tissue by its strong Ca signal (Fig. 7c). Increased levels of Na are  
282 also observed in the mineralized septum (Fig. 8f) unlike Cl levels which appear very low in  
283 the mineral (Fig. 8e). This is because Na is incorporated into the aragonite lattice of coral  
284 skeleton with a molar ratio of 1-2% (Na/Ca) (53, 54). We used the cryo-EDS analysis to  
285 obtain the Cl:Na ratio in the ECM which is  $1.08 \pm 0.05$ , and is thus close to the Cl:Na ratio in  
286 seawater, i.e., 1.13 (59), and different from the cellular Cl:Na ratio, 0.8 or lower (58). After  
287 Na and Cl, the next major seawater ions are  $Mg^{2+}$ ,  $SO_4^{2-}$ ,  $Ca^{2+}$  and  $K^+$ . These cations have  
288 natural concentrations in seawater that are below the detection limit of the cryo-EDS  
289 technique (33), and therefore are not detected in the ECM in our analysis. This is, to our  
290 knowledge, the first direct imaging of dissolved Na and Cl in the ECM solution. These results  
291 strongly support that the ECM contains seawater.

## 292 293 Discussion

294 We combined in vivo dynamics, morphological characterization and elemental analysis  
295 together with scRNA-seq analysis, techniques coming from two different fields of study, to  
296 characterize the calcifying interface during skeleton formation in the primary polyp life stage  
297 of the stony coral *S. pistillata*. Our cryo-SEM observations confirm the mineral  
298 micro-structure, the aboral tissue layers and calicoblastic cell morphologies previously

documented in stony corals using other imaging techniques (4, 22, 24, 26). We further show that calicoblastic cells produce an elaborate filopodial network containing a multitudinous population of carbon-enriched vesicles that processes towards the tissue mineral interface. The large dimensions of this network with respect to the size of the calicoblastic cells, as well as the related up-regulation in calicoblasts of genes associated with filopodia development, imply that these networks play an important role in calicoblastic cell activity. We also documented unique tissue arrangements at the mineral-calicoblastic layer interface which include larger ECM pockets and paracellular spaces than previous estimations (4, 26, 28). This goes together with our observation of high tissue permeability in the primary polyp, and, with our indication of seawater in the ECM, as suggested in previous studies (51, 52, 60). One possible function of the increased tissue permeability and large ECM volumes composing seawater documented here in primary polyps may be to enhance ion transport for mineralization in order to support high mineralization rates in this life stage, as also supported by the scRNA-seq data (37).

### **Seawater transport to the mineralization site**

Indications for a paracellular pathway connecting the external seawater with the mineralization site were found in stony corals by using the cell impermeable dye calcein (42, 51, 61, 62). Further indication for the transport of seawater to the mineralization site comes from stable isotope incorporation experiments (52). In this study, we used cryo-EDS analysis to directly image the ECM fluid and its elemental composition in a ‘native like’ state and found further evidence that seawater is indeed incorporated into the ECM. This brings up intriguing questions such as: (i) What is the volume and turn-over rate of seawater in the mineralization site? and (ii) what is the role of seawater in the mineralization process? (4, 22, 42, 52) Two important parameters required to pursue these questions are the permeability of the coral tissue and the dimensions of the ECM layer. Tissue permeability tests performed on adult *S. pistillata* micro-colonies showed that molecules and particles of sizes between 13 Å-20 nm diffuse via the paracellular pathway; this size range was therefore considered as the size of the intercellular junctions connecting one cell to the other, i.e. the coral ‘septate junctions’ (42). Indeed, septate junctions have been documented and characterized in *S. pistillata* micro-colonies (26, 63). However, observations of the present study show a significantly higher tissue permeability of primary polyps compared with their adult counterpart, with particles of 1 µm size passing through their epithelial tissue (Fig. 6c). Two possible pathways for particle incorporation into tissues are an intracellular pathway

(micropinocytosis) and a paracellular pathway. A size of 1  $\mu\text{m}$  is much larger than the maximal size of particles documented to be incorporated into the coral epithelial tissue via macropinocytosis, i.e., 200nm (62), although this does not rule out micropinocytosis as an incorporation pathway at this stage. A size of 1  $\mu\text{m}$  also cannot be attributed to a septate junction (63). Nevertheless, in order for septate junction size to impose whole tissue permeability, an assumption must be made, that all adjacent cells are attached to one another via septate junctions. The dispersed cell packing in the calicoblastic cell layer with paracellular spaces of few micrometers (Fig. 6a) documented here, challenges this basic assumption. We therefore infer that while some calicoblastic cells are attached to their neighboring cells via septate junctions, others are bathed within the ECM and separated by few microns from some of their adjacent cells. Our observations, thus, show that tissue permeability is not solely defined by septate junction dimensions, and that it is significantly higher in primary polyps than previously documented for adult micro-colonies of the same species (42). We describe here an intriguing and highly dispersed cellular arrangement of the calicoblastic layer, contradicting the previous conceptual framework on cell packing in the coral calicoblastic tissue and possibly even in epithelial tissues of other organisms. One reason why the dispersed cell packing documented here was not reported in earlier studies performed on *S. pistillata* may be that it is more characteristic of the primary polyps than of the adult life stage which was mainly used in previous studies (26, 28, 47). Additionally, the loosely attached cells found in close proximity with the septa even of existing in adult specimen are expected to be underrepresented in TEM thin sections, histological sections and fluorescent imaging involving a post-fixation demineralization procedure (which are the major techniques used in previous studies). This is because the loosely attached parts of the tissue can be washed away from the sample during de-mineralization and solution exchange steps involved in sample preparation (28). Therefore, the possible existence of a dispersed cell packing also in adult corals should not be ruled out.

We also observe that cellular packing can vary between dispersed and tight arrangements at different locations within the same coral specimen. It is as yet unclear whether the observed differential arrangement is actively controlled. One function of a dispersed cellular arrangement may be used to locally and temporally change tissue permeability. Corals were shown to control their overall body permeability and to modify it in response to external stressors such as osmotic pressure and temperature change (61). It is, therefore, reasonable to assume that they can also locally modify their tissue permeability along the forming skeleton

365 according to their needs. One possible role of the paracellular pathway connecting the  
366 external seawater with the ECM is the transport of ions used for mineralization to the  
367 mineralization site. In such a case, changing tissue permeability may be a way to increase  
368 seawater supply to the mineralization site during periods of rapid mineralization activity. This  
369 is also while increasing cell surface area in contact with seawater, which may be used to  
370 increase absorption of ions from the seawater into the cells. However, any relation between  
371 locally increased tissue permeability and the mineralization activity has yet to be  
372 demonstrated in stony corals. Regardless of the function that tissue permeability modification  
373 plays in stony corals, the observation that primary polyps have higher tissue permeability than  
374 adult coral colonies may make them more vulnerable to micro- plastic contamination,  
375 sediment suspension or sewage pollution and should, therefore, be further studied and taken  
376 into account in coral reef management.

377 Another important parameter to understand the role of incorporated seawater in the calcifying  
378 space, in addition to coral tissue permeability, is the thickness of the ECM layer. The ECM  
379 is the site where aragonite micro-crystals comprising the coral skeleton crystalize and grow  
380 (4, 51). The ECM is largely documented as a thin non-cellular fluid or gelatinous layer with  
381 a thickness of nanometers to 1 micron filling the space between the mineral and the  
382 calicoblastic tissue (4, 22, 24, 26, 28). Previously hypothesized (24, 25) areas in which  
383 calicoblastic tissue is locally lifted away from the mineral creating semi-delimited ECM  
384 spaces are referred as ‘ECM pockets’. Recent studies using in-vivo fluorescence imaging  
385 show growing evidence for such pockets and further report tissue contraction movements in  
386 these pockets that facilitate flow of the ECM fluid between them (51). Our in-vivo  
387 observation also support simultaneous contraction movements of the tissue around the  
388 forming septa, which modifies the ECM layer thickness along them in primary polyps. Exact  
389 measurements, however, of the thickness of the ECM layer in these pockets cannot be made  
390 solely based on light microscopy, due to resolution, optical contrast and penetration depth  
391 limitations, or either based on histological sections or TEM thin sections in which the ECM  
392 fluid is effectively replaced during preparation procedures. We thus used cryo-fixation  
393 (keeping the sample fully hydrated) and cryo-SEM imaging to measure the local thickness of  
394 the ECM layer. We documented a thickness of tens of  $\mu\text{m}$  of the ECM in such pockets, which  
395 is significantly larger than previous estimations (4). We also document high variability in  
396 ECM thickness measured along septal surfaces. These findings are relevant to achieve a better  
397 understanding of the biomineralization mechanism taking place in the ECM layer. One model

398 discussed in the literature is ion-by-ion crystallization of the aragonite micro-crystals from a  
399 saturated solution, where the ECM fluid functions as the saturated mother solution for  
400 mineralization (64). Stable isotope incorporation studies (52) support the ion-by-ion strategy.  
401 This strategy requires the cycling of large volumes of the mother solution for mineralization  
402 in the organism body. A missing link in this model for calculating seawater turn-over rates in  
403 the ECM is the ratio between the volume of the ECM and the surface area of the septum  
404 mineral, i.e. the ECM thickness considering a simplified box shape of the ECM. The model  
405 predicts ECM thickness of tens of  $\mu\text{m}$ , and therefore observations of the current study  
406 supports the feasibility of this model (52, 55). However, our observations of a high spatial  
407 and temporal variation of the ECM thickness in the current study imposes more complexity  
408 on the calculations than using a simplified box model with a constant ECM thickness. Spatial  
409 variability of the ECM thickness along the septum suggests active tuning of the ECM size  
410 and shape according to mineralization needs. This is in agreement with previous observations  
411 that coral mineralization is non-continuous along the skeleton but is rather patchy in time and  
412 space on a spatial scale greater than tens of microns (52, 65).

413 The observation that ECM pockets can reach up to tens of microns in thickness also helps to  
414 explain another recent observation of primary cilia in some calicoblastic cells of *S. pistillata*  
415 micro-colonies (66). Primary cilia are differentiated from filopodia by their shorter length and  
416 straight stalk-like morphology. They also make up a much smaller portion of the surface area  
417 of cells, as they are restricted to one primary cilium per calicoblastic cell. While primary cilia,  
418 like filopodia, can be observed by cryo-SEM as used in the current study, it is hard to  
419 differentiate them from other cytoplasmic extrusion using this technology alone. Primary cilia  
420 act as mechanosensors that translate extracellular stimulations from the external micro-  
421 environment to intracellular signals in different organisms (67), and in the case of corals they  
422 are thought to transfer signals from the ECM to the calicoblastic cells (66). One question  
423 raised by those authors is whether the cilia have enough space in the ECM to stretch and bend  
424 considering their length of 1-2  $\mu\text{m}$ . Our observation of the range of ECM thicknesses shows  
425 that they certainly do. It is possible, therefore, that primary cilia play a role in sensing and  
426 controlling ECM fluid flow inside ECM pockets.

427 The high-pressure freezing fixation technique used in this study holds limitation on specimen  
428 dimensions, which are up to 3mm in diameter and 200 $\mu\text{m}$  in thickness (29). Thus, allowing  
429 the analysis of primary polyps but not of adult corals. The observation of increased tissue  
430 permeability and thick ECM pockets composing seawater may, therefore, be attributed only

431 to primary polyps at this stage. However, possible manifestation of these tissue arrangements  
432 also in the adult life stage should not be ruled out. The calciblastic filopodia network  
433 composing large population of carbon rich vesicles observed at the interface between the cells  
434 and the forming skeleton is intriguing and require further study in order to resolve its function.  
435 We also cannot deduce the contents of the vesicles with the techniques used in this study.  
436 Carbon enrichment in these vesicles may be attributed to skeletal organic biomolecules  
437 transported to the mineralization site to construct the forming skeleton, but may also be  
438 attributed to other organic molecules used for different physiological processes carried out by  
439 the calciblastic cells other than the mineralization process.

### 440 **Ions for mineralization**

441 While we provide here further evidence that seawater is a component of the ECM, it is  
442 important to stress that this does not mean the ECM directly reflects ocean chemistry or that  
443 external changes in seawater chemistry affects skeleton mineralization in an uncontrolled  
444 manner. Previous studies and our cryo-SEM observations reported here show that ECM  
445 pockets are largely delimited spaces, in which internalized seawater is prone to strict  
446 biological control and modification induced by the calciblastic cells. The control and  
447 alteration of ECM chemistry by the coral tissue is clearly evident from previous work  
448 showing elevated concentrations of  $\text{Ca}^{2+}$ ,  $\text{CO}_3^{2-}$ , pH levels and thus aragonite saturation state  
449 ( $\Omega_{\text{arag}}$ ) inside ECM pockets relative to the external seawater (68, 69). The concentration of  
450  $\text{Ca}^{2+}$  ions in seawater is roughly fifty times higher than  $\text{CO}_3^{2-}$  concentration (69). Therefore,  
451 upon delivery of external seawater to the mineralization site (as supported by our  
452 observations)  $\text{CO}_3^{2-}$  is the limiting factor for mineralization, although there is some evidence  
453 that  $\text{HCO}_3^-$  also contribute to the DIC pool used for mineralization (70). This is in agreement  
454 with stable isotope incorporation studies suggesting that the major part of  $\text{Ca}^{2+}$  ions used for  
455 coral biomineralization is delivered as dissolved  $\text{Ca}^{2+}$  ions found in the seawater which is  
456 incorporated into the ECM, rather than active  $\text{Ca}^{2+}$  pumping (52). Moreover, It has been  
457 consistently observed by-proxy and by direct micro-electrode measurements that both  $\text{CO}_3^{2-}$   
458 and total dissolved inorganic carbon (DIC) levels are elevated above seawater levels in the  
459 ECM (52, 69–73). The scRNA-seq data of the primary polyps may also support a possible  
460 DIC concentration mechanism. The latter shows that two bicarbonate co-transporters (SLC4 $\gamma$   
461 and SLC4A10) are among the most specific and highly expressed genes in the calciblasts of  
462 primary polyps, with more than 80% of their total expression in calciblast. SLC4 $\gamma$  that was  
463 reported to be a specific isoform to stony corals (74), shows even more specific expression,

464 with 90% of its total expression in the calicoblastic cells (Fig. S1). These results are consistent  
465 with previous studies showing a specific immunolocalization of SLC4 $\gamma$  to the calicoblastic  
466 ectoderm, with the authors suggesting SLC4 $\gamma$  to be responsible for supplying bicarbonate to  
467 the calcification site (74). In addition, according to the scRNA-seq data, primary polyp  
468 calicoblasts show enrichment of six carbonic anhydrase (CA) genes, encoding enzymes that  
469 catalyze the interconversion of carbon dioxide and bicarbonate (Fig. S4), including STPCA  
470 (XP\_022801446) shown to be localized to calicoblasts (75) and STPCA2 (XP\_022799914)  
471 found in *S. pistillata* skeleton proteomes (39, 76).

472 While some evidence support an ion-by-ion crystallization strategy exploited in stony corals  
473 skeletogenesis (52), other observations support an alternative strategy of crystallization via  
474 an amorphous calcium carbonate (ACC) precursor phase (57, 71, 77, 78). In this study, we  
475 did not observe any dense Ca<sup>2+</sup> storage compartments in the calicoblastic cell layer, the ECM  
476 or in any of the other coral tissue layers. Ca<sup>2+</sup> concentrations in an ACC phase are typically  
477 in the molar range (79) and therefore well within the detection limit of the cryo-EDS  
478 technique, which is 25-50 mM (33). However, this negative observation does not rule out the  
479 existence of such phases in other parts of the primary polyp body, in sizes smaller than our  
480 resolution limits (few nm) or in times points or life stages other than that of the primary polyps  
481 studied here. Mineralization via an ACC precursor may also be more pronounced in the  
482 formation of the CoCs, which are characterized by a nano-granulated surface texture typical  
483 of biominerals formed via an ACC precursor (44), compared with the elongated  
484 micro-crystallites composing the rest of the septum (23). Indeed, a bi-model combining both  
485 mineralization via an ACC precursor and ion-by-ion mineralization from a saturated solution  
486 has been proposed in the literature (71).

487 We used a combined structural, chemical and molecular analysis approach to gain new  
488 insights into the biomineralization process of stony corals, a process integral to the health,  
489 resilience, and persistence of coral reefs. Our observations clarify the range of dimensions  
490 between cells, and of the calcifying space, i.e. between the tissue and the skeleton and reveal  
491 increased tissue permeability in the primary polyp life stage compared with the tissue  
492 permeability of the adult life stage documented in previous works. These measures are  
493 important links that were previously missing in efforts to rectify the different  
494 biomineralization models debated in the literature. We show an intimate involvement of large  
495 volumes of incorporated seawater in the mineralization site, thus providing a new conceptual  
496 framework for understanding the ‘vital effect’ observed in geochemical studied using

497 paleoceanographic tracers contained in stony coral skeletons (16, 52, 60). These observations  
498 are also important for better understanding the resilience of newly recruited primary polyps  
499 to different stressors affecting the coral reef. The increased tissue permeability and rapid  
500 incorporation of the external seawater to the mineralization site potentially make these newly  
501 recruited corals more vulnerable than adult corals to changes in the external seawater. This  
502 includes current and future proposed global changes such as ocean acidification, for which  
503 corals need to compensate in order to maintain a micro-environment favoring mineralization,  
504 and local stressors such as micro-plastic contamination, sewage pollution and sediment  
505 suspension, all of which would potentially be more rapidly incorporated into the body of  
506 primary polyps compared with their adult counterparts. This should be considered in risk  
507 assessment and management of coral-reef ecosystems around the globe. By exploiting new  
508 experimental approaches, our observations add up to several recent studies (15, 37, 68),  
509 revealing a larger and more versatile biological toolkit exploited by corals for their  
510 biomineralization process than previously recognized.

## 512 **Materials and Methods**

### 513 ***Stylophora pistillata* primary polyps**

514 *S. pistillata* larvae were collected from colonies at depths of 8-14 m in the reef adjacent to the  
515 Interuniversity Institute of Marine Sciences (IUI), 29°30'06.0"N 34°54'58.3"E, in the Gulf of  
516 Aqaba (Israel) under a special permit from the Israeli Natural Parks Authority. Collection was  
517 performed using larvae traps made of 160 µm plankton nets following Neder et al. (57).  
518 Collected larvae were acclimated overnight under ambient conditions (~25 °C and ~pH 8.2)  
519 in a flow-through outdoor aquarium exposed to natural lighting with fresh seawater filtered  
520 to 60 µm. After undergoing metamorphosis, planula were allowed to settle as primary polyps  
521 using seawater volume limitation for a few minutes on a glass bottom dish (for light  
522 microscopy) or on a high-pressure freezing aluminum disc, (for cryo-fixation and cryo-SEM  
523 imaging). After initial attachment to the substrate, primary polyps were re-immersed in larger  
524 seawater volumes. The settled primary polyps commenced mineral deposition and were used  
525 for all experiments two to five days post-settlement.

### 526 **In-vivo calcein labeling and imaging**

527 Primary polyps were incubated in freshly filtered (0.2 µm) seawater with 3 µM calcein  
528 blue (Sigma–Aldrich 54375-47-2) for 4-5 hours. Specimens were then rinsed with filtered  
529 (0.2 µm) seawater. Calcein labeled primary polyps were observed using an inverted confocal  
530 laser-scanning microscope (Nikon A1R) with a Plan Fluor 10x DIC L objective. Images were



531 acquired in three channels: Blue (calcein, ex: 406 nm, em: 450 ±50nm), green (host  
532 endogenous green fluorescent protein, ex: 492 nm, em: 525 ±50 nm) and red (photosymbiont  
533 chlorophyll, ex: 492 nm, em: 700 ±75 nm). Pinhole size was 21.7 µm. White light images of  
534 primary polyps were also obtained using both a Leica DM2000 micro-system with a 10x  
535 Leica HI PLAN 10x/0.25 objective and Nikon eclipse T1 microscope with a color camera  
536 Nikon Ds-Ri2 using an S Plan Fluor ELWD 40x DIC N1 objective. All images were acquired  
537 with the Nikon Nis-Elements software (Nikon Instruments, Melville, NY, United States).

### 538 **In-vivo fluorescence bead labeling and imaging**

539 Fluorescent bead labeling solution was prepared by diluting 2µl aqueous suspension of  
540 fluorescent yellow-green beads (Diameter=1µm) (Merck L4655) in 8ml freshly filtered  
541 (0.2 µm) seawater. Primary polyps were incubated in the fluorescence bead labeled seawater  
542 solution for 2hr, and imaged with inverted confocal laser-scanning microscope (Nikon A1R)  
543 with both Plan Fluor 10x DIC L and Plan Fluor 40x Oil HN2 objectives. Images were  
544 acquired in three channels: Green (fluorescence beads ex: 492 em: 525±50), red  
545 (photosymbiont chlorophyll, ex: 492 nm, em: 700 ±75 nm) and laser transmitted image.  
546 Pinhole size was 61.3 µm. Time-lapse datasets were obtained using Plan Fluor 10x DIC L  
547 objective by acquiring 49 time points in 6min. Z-stack data sets were acquired using Plan  
548 Fluor 40x Oil HN2 objective to cover the entire thickness of the primary polyp tissue in the  
549 observed area with 2µm steps. All images were acquired with the Nikon Nis-Elements  
550 software (Nikon Instruments, Melville, NY, United States).

### 551 **Cryo-EM techniques**

552 Primary polyps 4-5 days post settlement underwent for high-pressure freezing, freeze  
553 fracture, cryo-planing and cryo-SEM/EDS imaging. The above techniques were performed  
554 following Mor Khalifa et al. (32, 33). In short:

#### 555 *High-pressure freezing (HPF)*

556 Calcein labeled and untreated live 4-5 d old *S. pistillata* primary polyps were immersed in a  
557 filtered (0.2 µm) natural seawater solution containing 10 wt% dextran (Fluka) as a cryo-  
558 protectant, and immediately high-pressure frozen (HPM10, Bal-Tec AG, Liechtenstein or EM  
559 ICE, Leica Micro-systems, Vienna, Austria) between two aluminum discs. The mounting  
560 procedure took up to 30 sec. Samples for freeze fracture were frozen between two identical  
561 aluminum discs (diameter = 3 mm, thickness = 100 µm) and samples for cryo-planing were  
562 frozen inside an aluminum disc of diameter = 3 mm, thickness = 200 µm with a flat aluminum  
563 cover.

### 564 **Cryo-planing**

565 High-pressure frozen samples were transferred to a cryo-microtome (UC6, Leica  
566 Micro-systems, Vienna, Austria) and planed at  $-150\text{ }^{\circ}\text{C}$  in a nitrogen atmosphere to achieve  
567 a flat cross section surface using a diamond blade (Cryotrim 20, DIATOME, Biel,  
568 Switzerland). Samples were then vacuumed to  $5 \times 10^{-7}$  mbar,  $-120\text{ }^{\circ}\text{C}$  (BAF 60, Leica  
569 Micro-systems, Vienna, Austria) and transferred for cryo-SEM imaging using a vacuum cryo-  
570 transfer device (VCT 100, Leica Micro-systems, Vienna, Austria). Finally, the samples were  
571 loaded into a scanning electron microscope, (Ultra 55 SEM, Zeiss, Oberkochen, Germany)  
572 where they were imaged at  $-120\text{ }^{\circ}\text{C}$ .

### 573 **Freeze-fracture**

574 High-pressure frozen samples were vacuumed to  $5 \times 10^{-7}$  mbar at  $-120\text{ }^{\circ}\text{C}$  and a fracture was  
575 conducted at the interface between the two HPF discs containing the sample (BAF 60, Leica  
576 Micro-systems, Vienna, Austria). One disc containing the exposed cryo-fixed, freeze-  
577 fractured primary polyp was transferred for cryo-SEM imaging using a vacuum cryo-transfer  
578 device (VCT 100, Leica Micro-systems, Vienna, Austria) and loaded into the SEM where it  
579 was imaged at  $-120\text{ }^{\circ}\text{C}$ .

### 580 **Cryo-Scanning Electron Microscopy /Energy Dispersive Spectroscopy (cryo- 581 SEM/EDS) analysis**

582 High-pressure frozen cryo-planed or freeze-fractured *S. pistillata* specimens were loaded into  
583 the SEM at  $-120\text{ }^{\circ}\text{C}$ . Cryo-planed samples were then heated to  $-105\text{ }^{\circ}\text{C}$  for 3-10 min (etching)  
584 to remove adsorbed surface nano-ice crystallites deposited on the sample surface during  
585 sample transfer. Freeze fractured samples did not undergo an etching procedure. Samples  
586 were then imaged to find loci of interest using an in-lens (in the column) secondary electron  
587 (SE) detector and an in-the-column energy selective backscattered electron (ESB) detector  
588 using the following microscope conditions: working distance = 2 mm, acceleration  
589 voltage = 1.5 kV and aperture = 10  $\mu\text{m}$ . After loci of interest were found and imaged in high  
590 resolution using both detectors, cryo-planed samples were transferred using a vacuum cryo-  
591 transfer device (VCT 100, Leica Micro-systems, Vienna, Austria) to a freeze fracture device  
592 (BAF 060; Bal-Tec) for carbon coating (8 nm) before EDS analysis. Samples were transferred  
593 back to the electron microscope and cryo-SEM/EDS analysis was performed using the  
594 following microscope conditions: working distance = 7 mm, acceleration voltage = 9 kV,  
595 aperture = 30  $\mu\text{m}$ . Cryo-EDS analysis was performed using a Bruker Quantax microanalysis  
596 system with an XFlash®6 60 mm detector. Element distribution maps and EDS spectra of  
597 areas of interest were obtained and analyzed using Esprit software.

### 598 **Cryo-fluorescence imaging**

Vitrified fractured primary polyp specimen were transferred from the SEM under a cryogenic temperature via VCT (VCT 100; Leica Microsystems) to the freeze-fracture device (BAF 060; Bal-Tec) where the VCT was vented with cold gaseous nitrogen. Samples were then unloaded into liquid nitrogen and transferred into a cryo-Correlative Light Electron Microscopy (cryo-CLEM) stage (Linkam, model CMS196), pre-cooled to liquid nitrogen temperature. The cryo-stage was mounted on an upright Leica TCS SP8 MP microscope, equipped with an external Non Descanned Detectors (NDD) HyD and Acusto Optical Tunable Filter (Leica micro-systems CMS GmbH, Germany) and internal HyD detectors for confocal imaging. Second Harmonic Generation (SHG) signal was excited by a Tunable femtosecond laser 680-1080 Coherent vision II (Coherent GmbH USA). A z-stack of fluorescence images was obtained using a 10x Leica HI PLAN 10x/0.25 objective and collected in three channels: Blue (calcein, Em: 412-473), Green (host endogenous green fluorescent protein, Em: 501-551nm) and Red (photosymbiont chlorophyll, Em: 650-737nm). The xy dimension of the overview image was composed of four fields of view automatically stitched together to cover the entire specimen and the z-stack vertical range was chosen to cover the entire topographic range of the specimen fractured surface (150  $\mu$ m) with a step size of 4  $\mu$ m. Cryo-fluorescence images were produced by max-projection of all z-stack images using FIJI and Leica SP8MPIImage analysis.

### **Image analysis**

We used Adobe Photoshop for brightness and contrast level adjustments of cryo-SEM/EDS/Fluorescence micro-graphs and manual stitching of high-resolution cryo-SEM micro-graphs to obtain large field-of-view high-resolution collage images. We conducted false coloring of SE mode cryo-SEM micro-graphs to highlight identified loci of interest (raw images without false coloring can be found in supplementary material Figure S5). Microsoft Excel was used for graphical representation of EDS spectrum.

### **Single cell RNA-seq data analyses**

Gene expression analysis and heatmaps were created from the recently published interactive Shiny (80) application “[https://sebe-lab.shinyapps.io/Stylophora\\_cell\\_atlas/](https://sebe-lab.shinyapps.io/Stylophora_cell_atlas/)” based on the *S. pistillata* single cell RNA-Seq (37). Gene expression levels as fold-change were normalized by computing a regularized geometric mean within each metacell and dividing this value by the median across metacells.

## References

1. M. L. Reaka-Kudla, Understanding and Protecting Our Biological Resources, in *Biodiversity II*: M. L. Reaka Kudla, D. E. Wilson, E. O. Wilson, Eds. (Joseph Henry Press, Washington, D.C, 1997), pp. 83–108.
2. J. M. Roberts, A. J. Wheeler, A. Freiwald, Reefs of the deep: the biology and geology of cold-water coral ecosystems. *Science*. **312**, 543–7 (2006).
3. L. A. Henry, J. M. Roberts, Global biodiversity in cold-water coral reef ecosystem, in *Marine Animal Forests: The Ecology of Benthic Biodiversity Hotspots*, S. Rossi, L. Bramanti, A. Gori, O. Covadonga, Eds. (Springer, Cham, 2017), pp. 235–256.
4. S. Tambutté, M. Holcomb, C. Ferrier-Pagès, S. Reynaud, É. Tambutté, D. Zoccola, D. Allemand, Coral biomineralization: From the gene to the environment. *J. Exp. Mar. Bio. Ecol.* **408**, 58–78 (2011).
5. J. L. Drake, T. Mass, J. Stolarski, S. Von Euw, B. van de Schootbrugge, P. G. Falkowski, How corals made rocks through the ages. *Glob. Chang. Biol.* **26**, 31–53 (2020).
6. M. Guillermic, L. P. Cameron, I. De Corte, S. Misra, J. Bijma, D. De Beer, C. E. Reymond, H. Westphal, J. B. Ries, R. A. Eagle, Thermal stress reduces pocilloporid coral resilience to ocean acidification by impairing control over calcifying fluid chemistry. *Sci. Adv.* **7**, eaba9958 (2021).
7. E. V. Kennedy, C. T. Perry, P. R. Halloran, R. Iglesias-Prieto, C. H. L. Schönberg, M. Wisshak, A. U. Form, J. P. Carricart-Ganivet, M. Fine, C. M. Eakin, P. J. Mumby, Avoiding coral reef functional collapse requires local and global action. *Curr. Biol.* **23**, 912–918 (2013).
8. M. Ateweberhan, D. A. Feary, S. Keshavmurthy, A. Chen, M. H. Schleyer, C. R. C. Sheppard, Climate change impacts on coral reefs: Synergies with local effects, possibilities for acclimation, and management implications. *Mar. Pollut. Bull.* **74**, 526–539 (2013).
9. O. Hoegh-Guldberg, P. J. Mumby, A. J. Hooten, R. S. Steneck, P. Greenfield, E. Gomez, C. D. Harvell, P. F. Sale, A. J. Edwards, K. Caldeira, N. Knowlton, C. M. Eakin, R. Iglesias-Prieto, N. Muthiga, R. H. Bradbury, A. Dubi, M. E. Hatziolos, Coral reefs under rapid climate change and ocean acidification. *Science*. **318**, 1737–1742 (2007).
10. T. P. Hughes, J. H. Connell, Multiple stressors on coral reefs: A long-term perspective. *Limnol. Oceanogr.* **44**, 932–940 (1999).
11. Y. M. Bozec, P. J. Mumby, Synergistic impacts of global warming on the resilience of coral reefs. *Philos. Trans. R. Soc. B Biol. Sci.* **370**, 1–9 (2015).
12. M. McCulloch, J. Falter, J. Trotter, P. Montagna, Coral resilience to ocean

- 665 acidification and global warming through pH up-regulation. *Nat. Clim. Chang.* **2**, 623–627  
666 (2012).
- 667 13. N. R. Evensen, M. Fine, G. Perna, C. R. Voolstra, D. J. Barshis, Remarkably high  
668 and consistent tolerance of a Red Sea coral to acute and chronic thermal stress exposures.  
669 *Limnol. Oceanogr.* **66**, 1718–1729 (2021).
- 670 14. S. Von Euw, Q. Zhang, V. Manichev, N. Murali, J. Gross, L. C. Feldman, T.  
671 Gustafsson, C. Flach, R. Mendelsohn, P. G. Falkowski, Biological control of aragonite  
672 formation in stony corals. *Science.* **356**, 933–938 (2017).
- 673 15. J. Stolarski, I. Coronado, J. G. Murphy, M. V Kitahara, K. Janiszewska, M. Mazur,  
674 A. M. Gothmann, A. S. Bouvier, J. Marin-Carbonne, M. L. Taylor, A. M. Quattrini, C. S.  
675 McFadden, J. A. Higgins, L. F. Robinson, A. Meibom, A modern scleractinian coral with a  
676 two-component calcite–aragonite skeleton. *Proc. Natl. Acad. Sci. U.S.A.* **118** (2021),  
677 doi:10.1073/pnas.2013316117.
- 678 16. B. Hönisch, N. G. Hemming, A. G. Grottoli, A. Amat, G. N. Hanson, J. Bijma,  
679 Assessing scleractinian corals as recorders for paleo-pH: Empirical calibration and vital  
680 effects. *Geochim. Cosmochim. Acta.* **68**, 3675–3685 (2004).
- 681 17. C. B. Field, V. R. Barros, D. J. Dokken, K. J. Mach, M. D. Mastrandrea, T. E. Bilir,  
682 M. Chatterjee, K. L. Ebi, Y. O. Estrada, R. C. Genova, B. Girma, E. S. Kissel, A. N. Levy,  
683 S. MacCracken, P. R. Mastrandrea, L. L. White, “Climate change 2014 impacts, adaptation  
684 and vulnerability: Part A: Global and sectoral aspects” (Intergovernmental panel on climate  
685 change 2014), doi:10.1017/CBO9781107415379.
- 686 18. J. H. Vandermeulen, Studies on reef corals. III. Fine structural changes of calicoblast  
687 cells in *Pocillopora damicornis* during settling and calcification. *Mar. Biol.* **31**, 69–77 (1975).
- 688 19. T. C. LaJeunesse, J. E. Parkinson, P. W. Gabrielson, H. J. Jeong, J. D. Reimer, C.  
689 R. Voolstra, S. R. Santos, Systematic revision of symbiodiniaceae highlights the antiquity  
690 and diversity of coral endosymbionts. *Curr. Biol.* **28**, 2570-2580.e6 (2018).
- 691 20. S. Martinez, Y. Kolodny, E. Shemesh, F. Scucchia, R. Nevo, S. Levin-Zaidman, Y.  
692 Paltiel, N. Keren, D. Tchernov, T. Mass, Energy sources of the depth-generalist mixotrophic  
693 coral *Stylophora pistillata*. *Front. Mar. Sci.* **7**, 988 (2020).
- 694 21. I. S. Johnston, The ultrastructure of skeletogenesis in germatypic corals. *Int. Rev.*  
695 *Cytol.* **67**, 171–214 (1980).
- 696 22. D. Allemand, É. Tambutté, D. Zoccola, S. Tambutté, Coral calcification under ocean  
697 acidification and global change in *Coral Reefs: An Ecosystem in Transition* (Springer  
698 Netherlands, 2011), pp. 119–150.

- 699 23. M. Sugiura, K. Yasumoto, M. Iijima, Y. Oaki, H. Imai, Morphological study of  
700 fibrous aragonite in the skeletal framework of a stony coral. *CrystEngComm*. **23**, 3693–3700  
701 (2021).
- 702 24. A. L. Cohen, Geochemical perspectives on coral mineralization. *Rev. Mineral.*  
703 *Geochemistry*. **54**, 151–187 (2003).
- 704 25. D. J. Barnes, Coral skeletons: An explanation of their growth and structure. *Science*.  
705 **170**, 1305–1308 (1970).
- 706 26. E. Tambutté, D. Allemand, D. Zoccola, A. Meibom, S. Lotto, N. Caminiti, S.  
707 Tambutté, Observations of the tissue-skeleton interface in the scleractinian coral *Stylophora*  
708 *pistillata*. *Coral Reefs*. **26**, 517–529 (2007).
- 709 27. L. Muscatine, E. Tambutte, D. Allemand, Morphology of coral desmocytes, cells  
710 that anchor the calicoblastic epithelium to the skeleton. *Coral Reefs*. **16**, 205–213 (1997).
- 711 28. P. L. Clode, A. T. Marshall, Low temperature FESEM of the calcifying interface of  
712 a scleractinian coral. *Tissue Cell*. **34**, 187–198 (2002).
- 713 29. P. Echlin, Current status of low-temperature microscopy and analysis in *Low-*  
714 *Temperature Microscopy and Analysis*, P. Echlin, Ed. (Springer US, 1992), pp. 491–498.
- 715 30. D. Studer, B. M. Humbel, M. Chiquet, Electron microscopy of high pressure frozen  
716 samples: Bridging the gap between cellular ultrastructure and atomic resolution. *Histochem.*  
717 *Cell Biol*. **130**, 877–889 (2008).
- 718 31. S. Pfeffer, J. Mahamid, Unravelling molecular complexity in structural cell biology.  
719 *Curr. Opin. Struct. Biol*. **52**, 111–118 (2018).
- 720 32. G. M. Khalifa, D. Kirchenbuechler, N. Koifman, O. Kleinerman, Y. Talmon, M.  
721 Elbaum, L. Addadi, S. Weiner, J. Erez, Biomineralization pathways in a foraminifer revealed  
722 using a novel correlative cryo-fluorescence–SEM–EDS technique. *J. Struct. Biol*. **196**, 155–  
723 163 (2016).
- 724 33. G. Mor Khalifa, K. Kahil, J. Erez, I. Kaplan Ashiri, E. Shimoni, I. Pinkas, L. Addadi,  
725 S. Weiner, Characterization of unusual MgCa particles involved in the formation of  
726 foraminifera shells using a novel quantitative cryo SEM/EDS protocol. *Acta Biomater*. **77**,  
727 342–351 (2018).
- 728 34. S. Kumar, K. Rechav, I. Kaplan-Ashiri, A. Gal, Imaging and quantifying  
729 homeostatic levels of intracellular silicon in diatoms. *Sci. Adv*. **6**, 7554–7570 (2020).
- 730 35. N. Allison, Reconstructing coral calcification fluid dissolved inorganic carbon  
731 chemistry from skeletal boron: An exploration of potential controls on coral aragonite B/Ca.  
732 *Heliyon*. **3**, e00387 (2017).

- 733 36. N. Allison, Comparative determinations of trace and minor elements in coral  
734 aragonite by ion microprobe analysis, with preliminary results from Phuket, southern  
735 Thailand. *Geochim. Cosmochim. Acta.* **60**, 3457–3470 (1996).
- 736 37. S. Levy, A. Elek, X. Grau-Bové, S. Menéndez-Bravo, M. Iglesias, A. Tanay, T.  
737 Mass, A. Sebé-Pedró, A stony coral cell atlas illuminates the molecular and cellular basis of  
738 coral symbiosis, calcification, and immunity. *Cell.* **184**, 1–15 (2021).
- 739 38. J. L. Drake, T. Mass, L. Haramaty, E. Zelzion, D. Bhattacharya, P. G. Falkowski,  
740 Proteomic analysis of skeletal organic matrix from the stony coral *Stylophora pistillata*. *Proc.*  
741 *Natl. Acad. Sci. U. S. A.* **110**, 3788–3793 (2013).
- 742 39. T. Mass, J. L. Drake, L. Haramaty, J. D. Kim, E. Zelzion, D. Bhattacharya, P. G.  
743 Falkowski, Cloning and characterization of four novel coral acid-rich proteins that  
744 precipitate carbonates in vitro. *Curr. Biol.* **23**, 1126–1131 (2013).
- 745 40. T. Zaquin, A. Malik, J. L. Drake, H. M. Putnam, T. Mass, Evolution of protein-  
746 mediated biomineralization in scleractinian corals. *Front. Genet.* **12**, 52 (2021).
- 747 41. Y. Peled, J. L. Drake, A. Malik, R. Almuly, M. Lalzar, D. Morgenstern, T. Mass,  
748 Optimization of skeletal protein preparation for LC–MS/MS sequencing yields additional  
749 coral skeletal proteins in *Stylophora pistillata*. *BMC Mater.* **2** (2020), doi:10.1186/s42833-  
750 020-00014-x.
- 751 42. E. Tambutté, S. Tambutté, N. Segonds, D. Zoccola, A. Venn, J. Erez, D. Allemand,  
752 Calcein labelling and electrophysiology: Insights on coral tissue permeability and  
753 calcification. *Proc. R. Soc. B Biol. Sci.* **279**, 19–27 (2011).
- 754 43. W. M. Goldberg, Feeding behavior, epidermal structure and mucus cytochemistry  
755 of the scleractinian *Mycetophyllia reesi*, a coral without tentacles. *Tissue Cell.* **34**, 232–245  
756 (2002).
- 757 44. A. Gal, K. Kahil, N. Vidavsky, R. T. Devol, P. U. P. A. Gilbert, P. Fratzl, S. Weiner,  
758 L. Addadi, Particle accretion mechanism underlies biological crystal growth from an  
759 amorphous precursor phase. *Adv. Funct. Mater.* **24**, 5420–5426 (2014).
- 760 45. A. Jacinto, L. Wolpert, Quick guide Filopodia. *Curr. Biol.* **11**, R634 (2001).
- 761 46. E. Martín-Blanco, E. Knust, Epithelial morphogenesis: Filopodia at work. *Curr.*  
762 *Biol.* **11**, 28–31 (2001).
- 763 47. M. D. A. Le Tissier, The ultrastructure of the skeleton and skeletogenic tissues of  
764 the temperate coral *Caryophyllia smithii*. *J. Mar. Biol. Assoc. United Kingdom.* **70**, 295–310  
765 (1990).
- 766 48. S. L. Gupton, F. B. Gertler, Filopodia: the fingers that do the walking. *Sci. Signal.*

767 **2007**, re5 (2007).

768 49. M. T. Branham, M. A. Bustos, G. A. De Blas, H. Rehmann, V. E. P. Zarelli, C. L.  
769 Treviño, A. Darszon, L. S. Mayorga, C. N. Tomes, Epac activates the small G proteins Rap1  
770 and Rab3A to achieve exocytosis. *J. Biol. Chem.* **284**, 24825–24839 (2009).

771 50. C. S. Park, P. H. Lee, Vesicular transport with emphasis on exocytosis. *Yonsei Med.*  
772 *J.* **35**, 355–377 (1994).

773 51. Y. Ohno, A. Iguchi, C. Shinzato, M. Gushi, M. Inoue, A. Suzuki, K. Sakai, T.  
774 Nakamura, Calcification process dynamics in coral primary polyps as observed using a  
775 calcein incubation method. *Biochem. Biophys. Reports.* **9**, 289–294 (2017).

776 52. A. C. Gagnon, J. F. Adkins, J. Erez, Seawater transport during coral  
777 biomineralization. *Earth Planet. Sci. Lett.* **329–330**, 150–161 (2012).

778 53. N. Schleinkofer, J. Raddatz, A. Freiwald, D. Evans, L. Beuck, A. Rüggeberg, V.  
779 Liebetrau, Environmental and biological controls on Na/Ca ratios in scleractinian cold-water  
780 corals. *Biogeosciences.* **16**, 3565–3582 (2019).

781 54. T. Mitsuguchi, T. Uchida, E. Matsumoto, Na/Ca variability in coral skeletons.  
782 *Geochem. J.* **44**, 261–273 (2010).

783 55. A. C. Gagnon, A. M. Gothmann, O. Branson, J. W. B. B. Rae, J. A. Stewart, Controls  
784 on boron isotopes in a cold-water coral and the cost of resilience to ocean acidification. *Earth*  
785 *Planet. Sci. Lett.* **554**, 116662 (2021).

786 56. A. Al-Sawalmih, F. A. Al-Horani, S. Al-Rousan, Elemental analysis of the coral  
787 *Stylophora Pistillata* incubated along the Jordanian coast of the Gulf of Aqaba. *Fresenius*  
788 *Environ. Bull.* **26**, 3029–3036 (2017).

789 57. M. Neder, P. P. Laissue, A. Akiva, D. Akkaynak, M. Albéric, O. Spaeker, Y. Politi,  
790 I. Pinkas, T. Mass, Mineral formation in the primary polyps of pocilloporoid corals. *Acta*  
791 *Biomater.* **96**, 631–645 (2019).

792 58. O. S. Andersen, Cellular electrolyte metabolism in *Encyclopedia of Metalloproteins*,  
793 R. H. Kretsinger, V. N. Uversky, E. A. Permyakov, Eds. (Springer-Verlag, New York, 2013),  
794 pp. 580–587.

795 59. M. E. Q. Pilson, Major constituents of seawater in *An Introduction to the Chemistry*  
796 *of the Sea*, Pilson M. E. Q., Ed. (Cambridge University Press, ed. 2nd, 2012), p. 67.

797 60. B. Hönlisch, A. Ridgwell, D. N. Schmidt, E. Thomas, S. J. Gibbs, A. Sluijs, R. Zeebe,  
798 L. Kump, R. C. Martindale, S. E. Greene, W. Kiessling, J. Ries, J. C. Zachos, D. L. Royer,  
799 S. Barker, T. M. Marchitto, R. Moyer, C. Pelejero, P. Ziveri, G. L. Foster, B. Williams, The  
800 geological record of ocean acidification. *Science.* **335**, 1058–1063 (2012).



- 801 61. A. A. Venn, C. Bernardet, A. Chabenat, E. Tambutté, S. Tambutté, Paracellular  
802 transport to the coral calcifying medium: effects of environmental parameters. *J. Exp. Biol.*  
803 **223** (2020), doi:10.1242/jeb.227074.
- 804 62. P. Ganot, E. Tambutté, N. Caminiti-Segonds, G. Toullec, D. Allemand, S. Tambutté,  
805 Ubiquitous macropinocytosis in anthozoans. *Elife*. **9**, 1–25 (2020).
- 806 63. P. Ganot, D. Zoccola, E. Tambutté, C. R. Voolstra, M. Aranda, D. Allemand, S.  
807 Tambutté, Structural molecular components of septate junctions in cnidarians point to the  
808 origin of epithelial junctions in eukaryotes. *Mol. Biol. Evol.* **32**, 44–62 (2015).
- 809 64. J. Erez, S. Reynaud, J. Silverman, K. Schneider, D. Allemand, Coral calcification  
810 under ocean acidification and global change in *Coral Reefs: An Ecosystem in Transition*  
811 (Springer Netherlands, 2011), pp. 151–176.
- 812 65. F. Houlbrèque, A. Meibom, J. P. Cuif, J. Stolarski, Y. Marrocchi, C. Ferrier-Pagès,  
813 I. Domart-Coulon, R. B. Dunbar, Strontium-86 labeling experiments show spatially  
814 heterogeneous skeletal formation in the scleractinian coral *Porites porites*. *Geophys. Res.*  
815 *Lett.* **36** (2009), doi:10.1029/2008GL036782.
- 816 66. E. Tambutté, P. Ganot, A. A. Venn, S. Tambutté, A role for primary cilia in coral  
817 calcification? *Cell Tissue Res.* **383**, 1093–1102 (2020).
- 818 67. W. A. A. Alaiwi, S. T. Lo, S. M. Nauli, Primary cilia: Highly sophisticated  
819 biological sensors. *Sensors*. **9**, 7003–7020 (2009).
- 820 68. T. B. Chalk, C. D. Standish, C. D. Angelo, K. D. Castillo, J. A. Milton, G. L. Foster,  
821 Mapping coral calcification strategies from in situ boron isotope and trace element  
822 measurements of the tropical coral *Siderastrea siderea*. *Sci. Rep.*, 1–14 (2021).
- 823 69. D. S. Sevilgen, A. A. Venn, M. Y. Hu, E. Tambutté, D. De Beer, V. Planas-Bielsa,  
824 S. Tambutté, Full in vivo characterization of carbonate chemistry at the site of calcification  
825 in corals. *Sci. Adv.* **5**, eaau7447 (2019).
- 826 70. N. Allison, I. Cohen, A. A. Finch, J. Erez, A. W. Tudhope, E. Ion, M. Facility, Corals  
827 concentrate dissolved inorganic carbon to facilitate calcification. *Nat. Commun.* **5**, 1–6  
828 (2014).
- 829 71. C. Y. Sun, C. A. Stifler, R. V. Chopdekar, C. A. Schmidt, G. Parida, V. Schoeppler,  
830 B. I. Fordyce, J. H. Brau, T. Mass, S. Tambutté, P. U. P. A. Gilbert, From particle attachment  
831 to space-filling coral skeletons. *Proc. Natl. Acad. Sci. U. S. A.* **117**, 30159–30170 (2020).
- 832 72. S. Comeau, C. E. Cornwall, M. T. McCulloch, Decoupling between the response of  
833 coral calcifying fluid pH and calcification to ocean acidification. *Sci. Rep.* **7**, 1–10 (2017).
- 834 73. M. T. McCulloch, J. P. D’Olivo, J. Falter, M. Holcomb, J. A. Trotter, Coral

- 835 calcification in a changing world and the interactive dynamics of pH and DIC upregulation.  
836 *Nat. Commun.* **8** (2017), doi:10.1038/ncomms15686.
- 837 74. D. Zoccola, P. Ganot, A. Bertucci, N. Caminiti-Segonds, N. Techer, C. R. Voolstra,  
838 M. Aranda, E. Tambutté, D. Allemand, J. R. Casey, S. Tambutté, Bicarbonate transporters  
839 in corals point towards a key step in the evolution of cnidarian calcification. *Sci. Rep.* **5**, 1–  
840 11 (2015).
- 841 75. A. Moya, S. Tambutté, A. Bertucci, E. Tambutté, S. Lotto, D. Vullo, C. T. Supuran,  
842 D. Allemand, D. Zoccola, Carbonic anhydrase in the scleractinian coral *Stylophora pistillata*:  
843 Characterization, localization, and role in biomineralization. *J. Biol. Chem.* **283**, 25475–  
844 25484 (2008).
- 845 76. P. Ramos-Silva, J. Kaandorp, L. Huisman, B. Marie, I. Zanella-Cléon, N. Guichard,  
846 D. J. Miller, F. Marin, The skeletal proteome of the coral *Acropora millepora*: The evolution  
847 of calcification by co-option and domain shuffling. *Mol. Biol. Evol.* **30**, 2099–2112 (2013).
- 848 77. A. Akiva, M. Neder, K. Kahil, R. Gavriel, I. Pinkas, G. Goobes, T. Mass, Minerals  
849 in the pre-settled coral *Stylophora pistillata* crystallize via protein and ion changes. *Nat.*  
850 *Commun.* **9** (2018), doi:10.1038/s41467-018-04285-7.
- 851 78. T. Mass, A. J. Giuffre, C. Y. Sun, C. A. Stifler, M. J. Frazier, M. Neder, N. Tamura,  
852 C. V. Stan, M. A. Marcus, P. U. P. A. Gilbert, Amorphous calcium carbonate particles form  
853 coral skeletons. *Proc. Natl. Acad. Sci. U.S.A.* **114**, E7670–E7678 (2017).
- 854 79. K. Kahil, N. Varsano, A. Sorrentino, E. Pereiro, P. Rez, S. Weiner, L. Addadi,  
855 Cellular pathways of calcium transport and concentration towards mineral formation in sea  
856 urchin larvae. *Proc. Natl. Acad. Sci. U.S.A.* **117**, 30957–30965 (2020).
- 857 80. W. Chang, J. Cheng, J. J. Allaire, Y. Xie, J. McPherson, shiny: Web Application  
858 Framework for R (2020) [https://sebe-lab.shinyapps.io/Stylophora\\_cell\\_atlas/](https://sebe-lab.shinyapps.io/Stylophora_cell_atlas/)
- 859

## 860 Acknowledgments

861 We would like to thank Dr. Neta Varsano for the illustration in figure 1a-d; Dr. Yoseph  
862 Addadi from the Life sciences core facilities, Weizmann Institute of Science, Israel, for his  
863 guidance and technical support with the cryo-fluorescence imaging; Dr. Eyal Shimoni from  
864 the Electron microscopy unit, Department of research support, Weizmann Institute of  
865 Sciences, Israel and Dr. Assaf Gal for their help with the cryo-SEM/EDS analysis; Dr. Boris  
866 Shklyar at the Bioimaging unit, Faculty of natural sciences, University of Haifa, Israel, for  
867 his guidance and technical support with the in-vivo imaging; Dr. Jeana Drake for her advice

868 on data interpretation and proofreading and to Maayan Neder, Itay Kolsky and Federica  
869 Scucchia for their help with sample collection.

870  
871 **Funding:** This work has received funding from the European Research Council under the  
872 European Union’s Horizon 2020 research and innovation programme (grant agreement No  
873 755876).

874  
875 **Author contributions:** GMK and TL conceptualize the study and designed the  
876 experiments. GMK performed the experiments, GMK and SL analyzed the data. All the  
877 authors interpreted the data, prepared the initial draft. All the authors revised the manuscript  
878 and approved the final version for publication.

879  
880 The authors declare that they have no competing interests

881  
882 All data needed to evaluate the conclusions in the paper are present in the paper and/or the  
883 Supplementary Materials

884

885

886 **Figures and Tables**

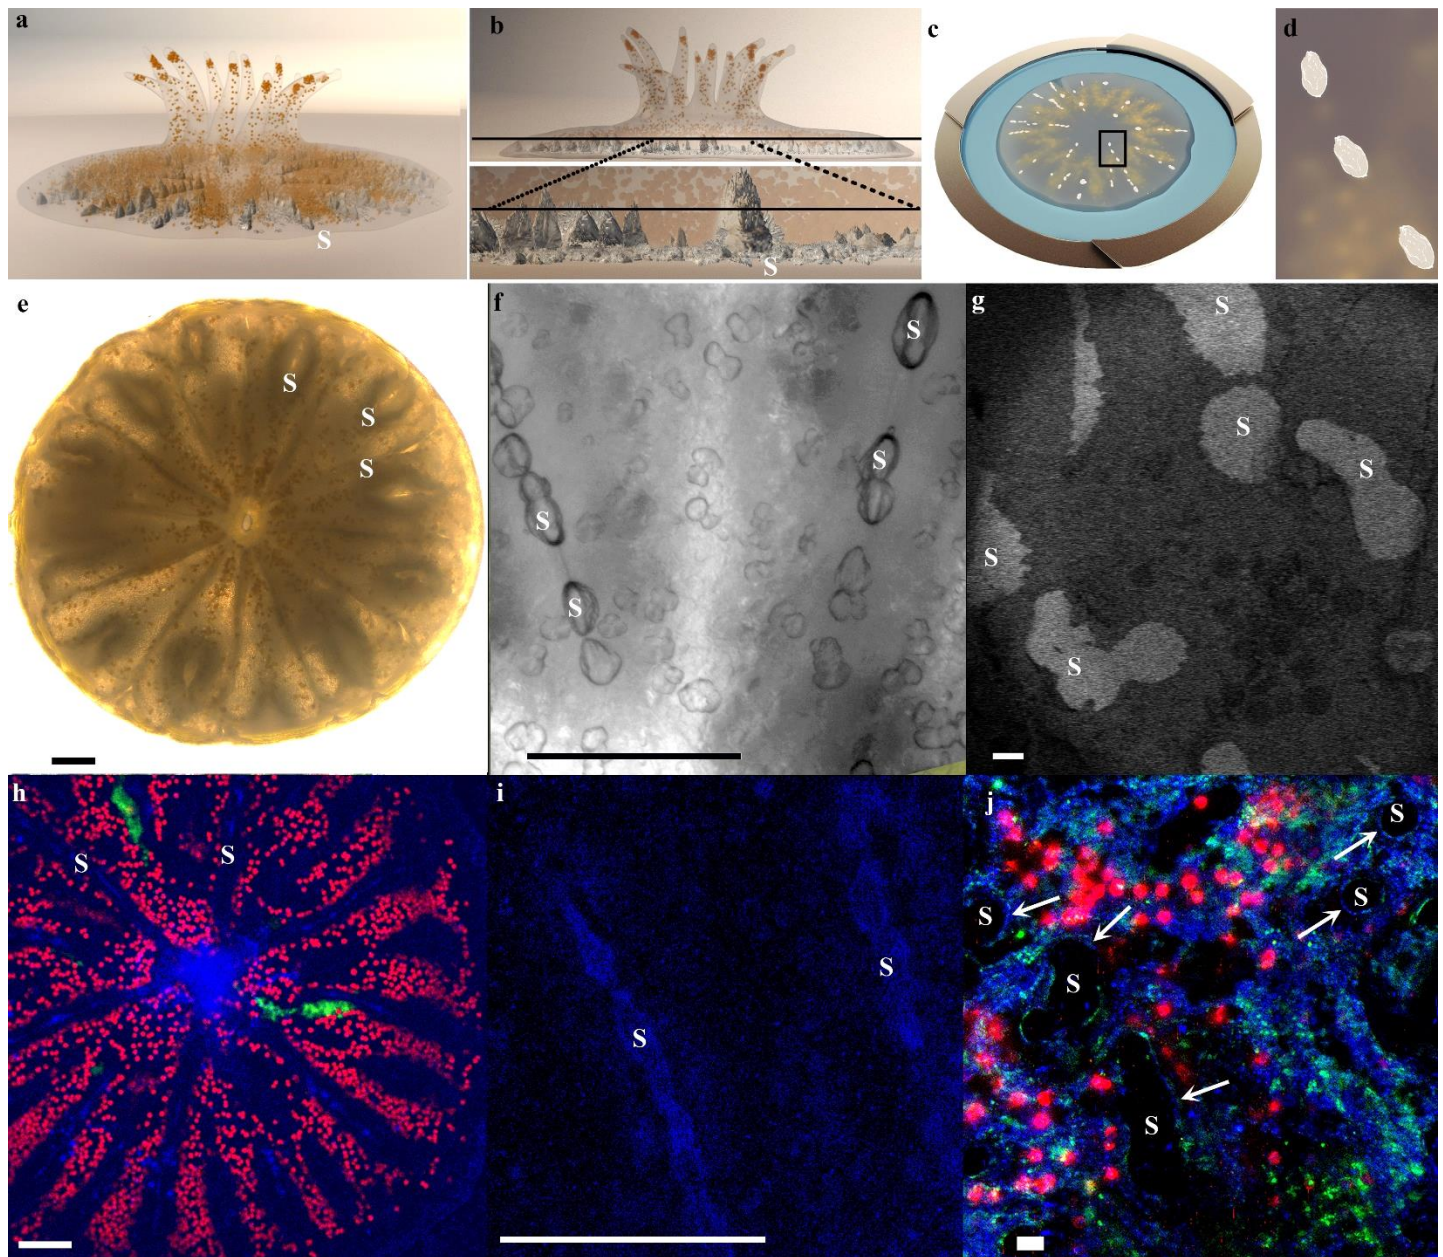

887

888

889

890

891

892

893

894

895

896

**Fig. 1: A Primary polyp and its forming mineralized septa.** (a) Illustration of a few days old primary polyp with 12 tentacles. Tissue is colored in transparent grey, endosymbionts in orange and mineral in white. (b) Upper panel: An illustration of the polyp (side view) internal plane (black line) revealed by cryo-planing. Bottom panel: A magnification of this same plane along two of the polyp septa. (c) Illustration of the high-pressure frozen, cryo-planed primary polyp (top view) vitrified in natural seawater (blue) inside a high-pressure freezing disc (gold). (d) Magnification of the area marked with black rectangle in (c). (e) Light microscopy image of five days old primary polyp. (f) Higher magnification wide field microscope image of two forming septa in the primary polyp. (g)

897 Cryo-SEM (ESB mode) micrograph of a high-pressure frozen freeze fractured primary  
898 polyp showing a non-continuous fracture surface of the forming septa. Septa mineral surface  
899 appears white and coral tissue surface appears grey. (h) Confocal laser scanning microscope  
900 overview image of a calcein-blue labeled primary polyp. Area of forming septa and mouth  
901 cavity are labeled in blue (calcein). Coral tissue auto-fluorescence is green and  
902 photosymbionts auto-fluorescence is red. (i) Higher magnification of two forming septa  
903 labeled with calcein blue (blue channel). (j) Cryo- fluorescence image of the same freeze  
904 fractured primary polyp as in (g) imaged in blue, green and red channels. Thin calcein blue  
905 labeled layer limning of the external surface of some septa is depicted with white arrows.  
906 **S-** septum mineral, **T-** tentacle. Scale bars: e, f, h, i- 100  $\mu\text{m}$ , g, j- 20  $\mu\text{m}$ .

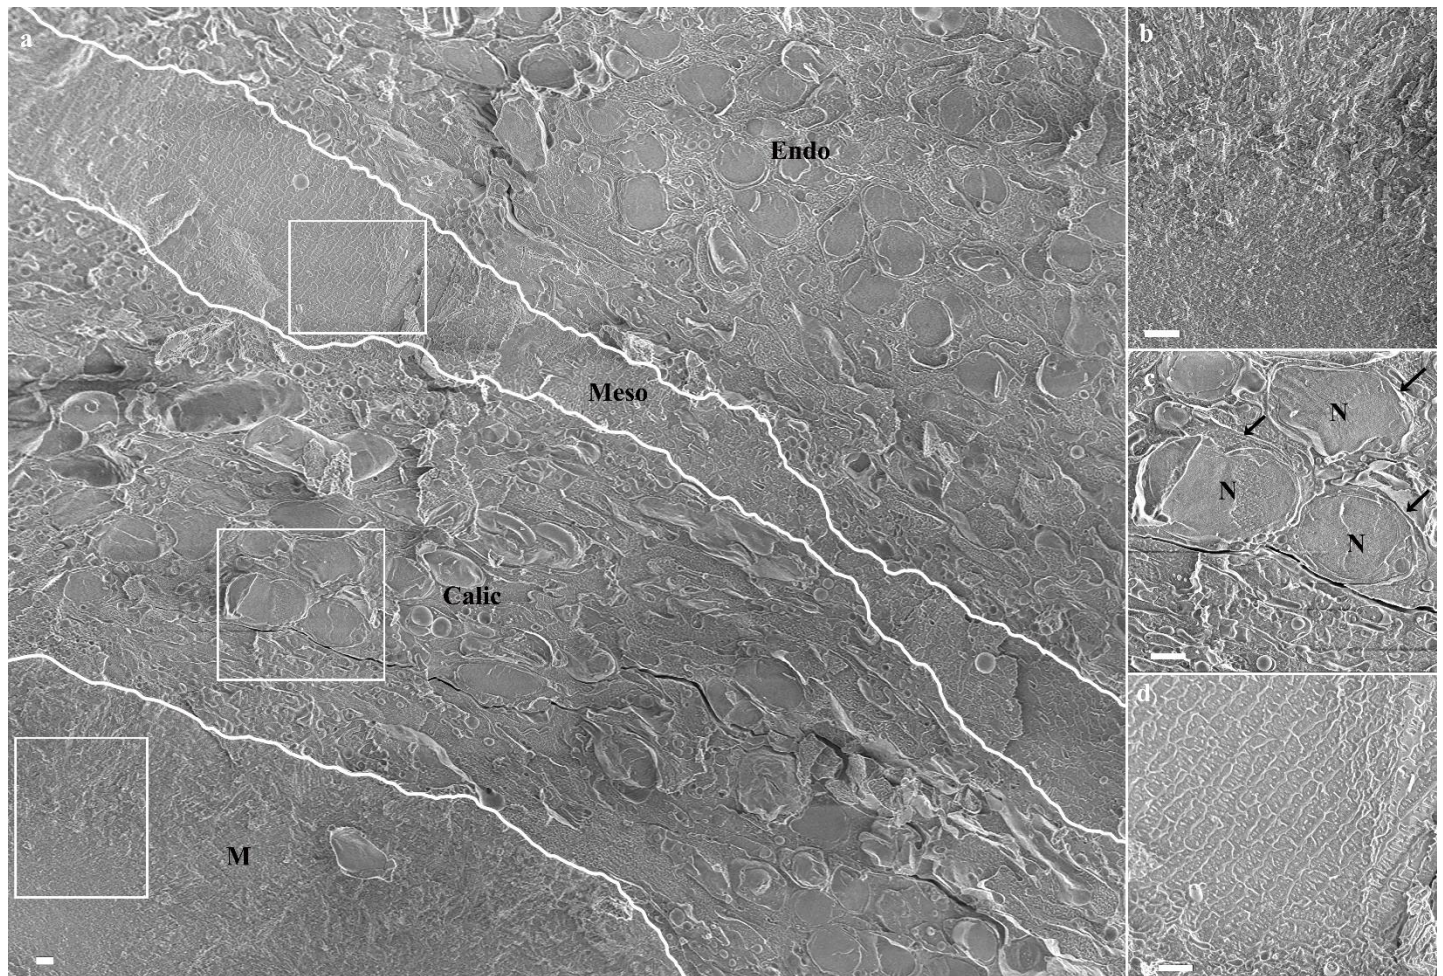

908  
909 **Fig. 2: A cryo-SEM micrograph of aboral body layers observed in a high-pressure**  
910 **frozen, freeze-fractured primary polyp.** (a) An overview image showing aboral body  
911 layers depicted by white separating lines including the mineral, **M**, (white rectangle is  
912 magnified in (b)), the calicoblastic cell layer, **Calic**, (white rectangle is magnified in (c)),

913 the non-cellular mesoglea, **Meso**, (white rectangle is magnified in (d)) and the endoderm  
914 (**Endo**). **N**-Nucleus. All scale bars are 1 $\mu$ m.

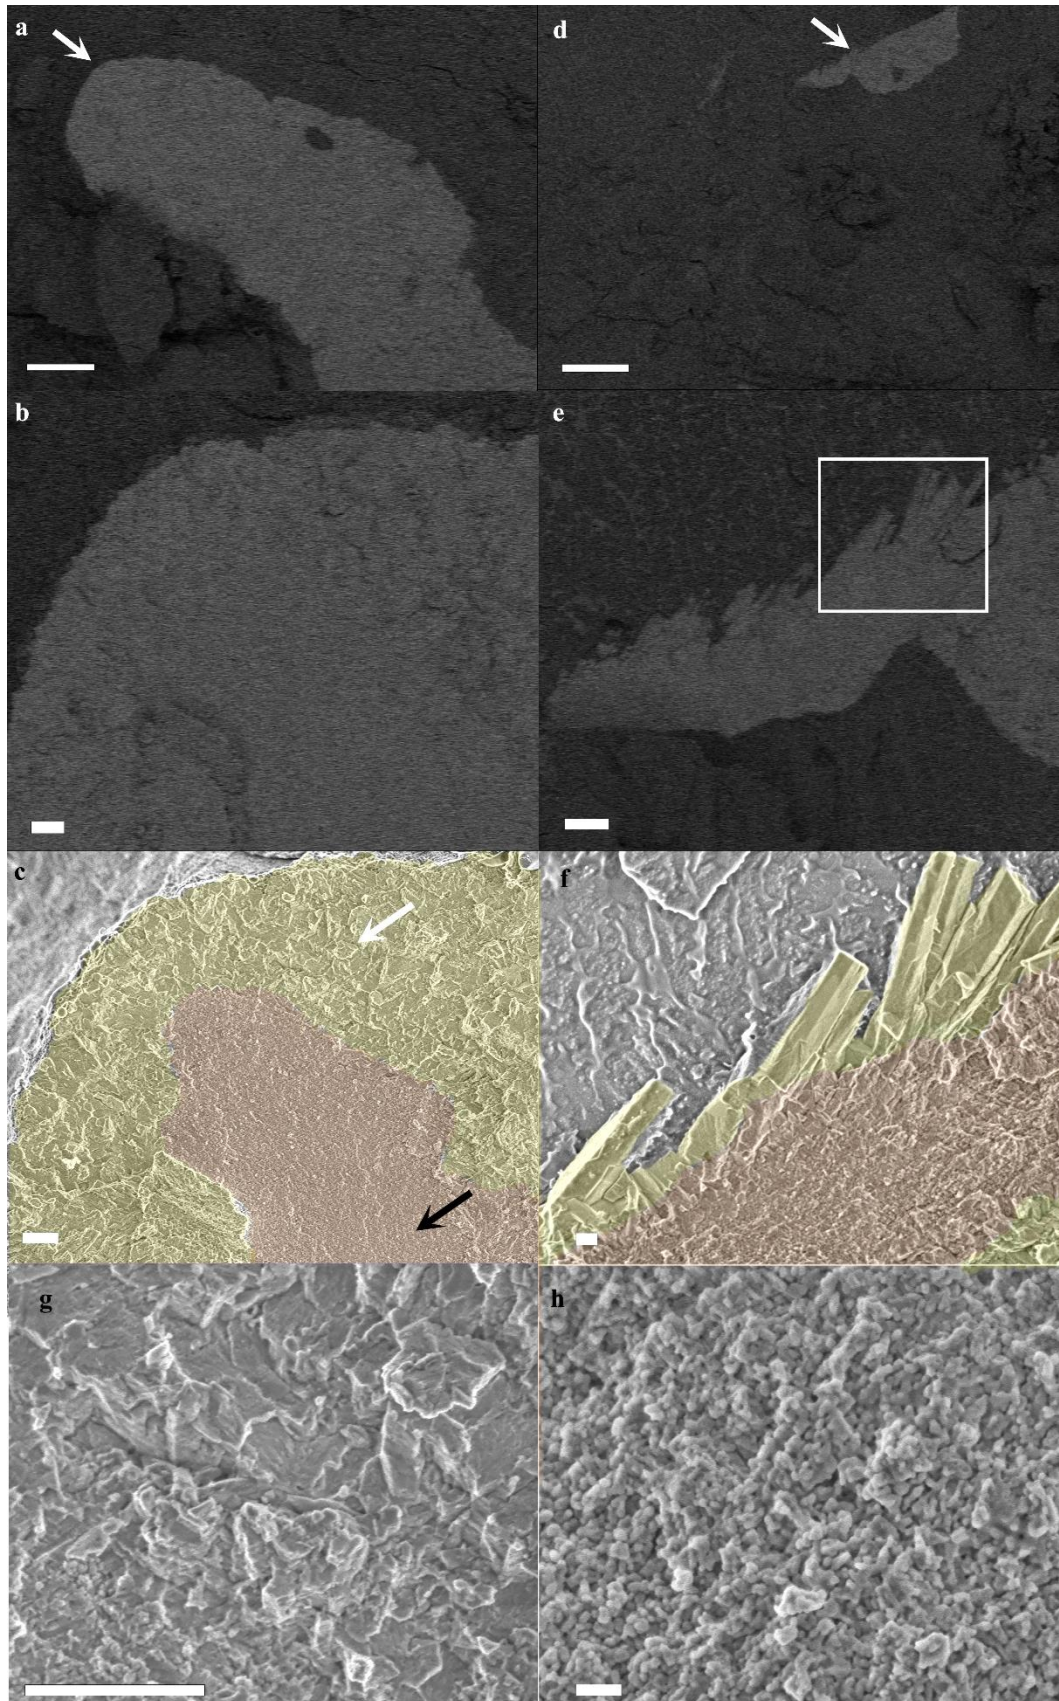

915

916 **Fig. 3: cryo-SEM micrographs of mature and forming septa in a primary polyp.** (a) a  
917 mature septum imaged in ESB mode. Mineral appear brighter than its surrounding tissue.  
918 (b) Magnification of the area pointed with white arrow in (a), (c) The same areas as in (b)  
919 imaged in SE mode with CoC and elongated microcrystals highlighted by false coloring.  
920 (d) A newly formed septum imaged in ESB mode. (e) Magnification of the area pointed  
921 with white arrow in (d). (f) SE mode image of the area marked with white rectangle in (e)  
922 with CoC and elongated microcrystals highlighted by false coloring. (g) Higher  
923 magnification of micron sized crystallites fracture surface pointed with white arrow in (c).  
924 (h) Higher magnification of CoC nano-spheres texture pointed with black arrow in (c).  
925 Orange- CoC. Yellow- Elongated micro-crystals. Scale bars are (a)-and (d)- 10  $\mu$ m, (b),  
926 (c), (e) and (g)-1  $\mu$ m, (f)-200 nm, (h)-100 nm.

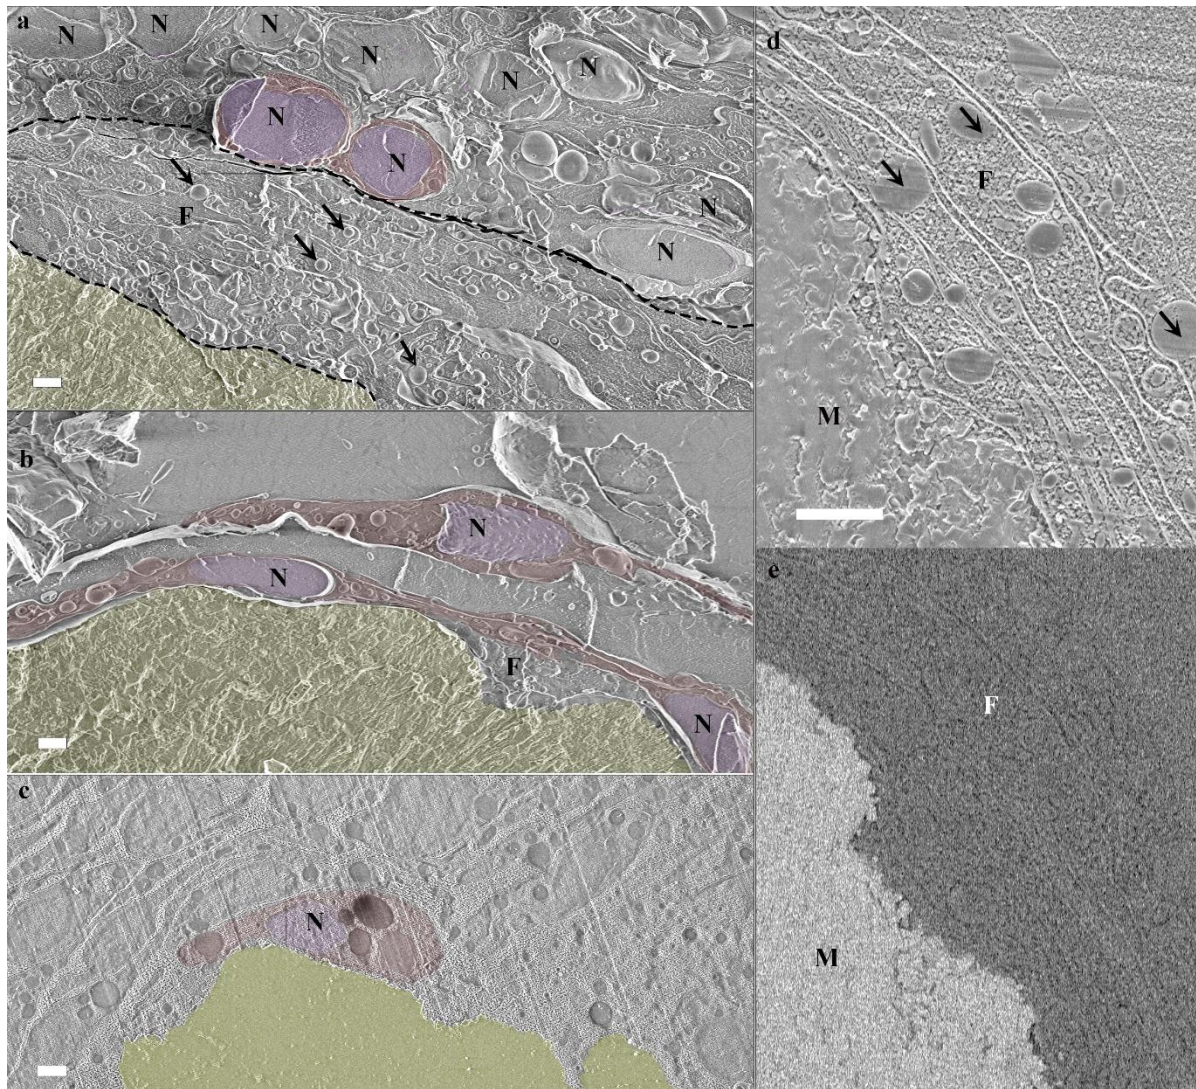

927 **Fig. 4: Calicoblastic cell morphologies observed in freeze-fractured (a-b) and cryo-**  
928 **planed (c-e) primary polyp using cryo-SEM.** (a) Calicoblastic cell layer (Imaged loci is  
929

930 the same as in Fig. 2c) with the septum mineral and two representative calicoblastic cells  
931 highlighted by false coloring. A filopodia network found between the calicoblastic cell  
932 bodies and the septum is denoted with dashed black lines. Four representative vesicles  
933 contained within the filopodia network are denoted with black arrows. (b) Three elongated  
934 calicoblast cells found in close proximity with the mineral. (c) A cup shaped calicoblastic  
935 cell attached to the mineral surface. (d) High magnification of filopodia found in close  
936 proximity with the mineral. (e) The same field of view as in (d) imaged in ESB mode. False  
937 coloring is used to highlight: Cell nucleolus (pseudo-purple), cell body (pseudo-red),  
938 septum mineral (pseudo-yellow). Scale bars are 1  $\mu\text{m}$ . N- nucleus, F- filopodia, M- mineral.

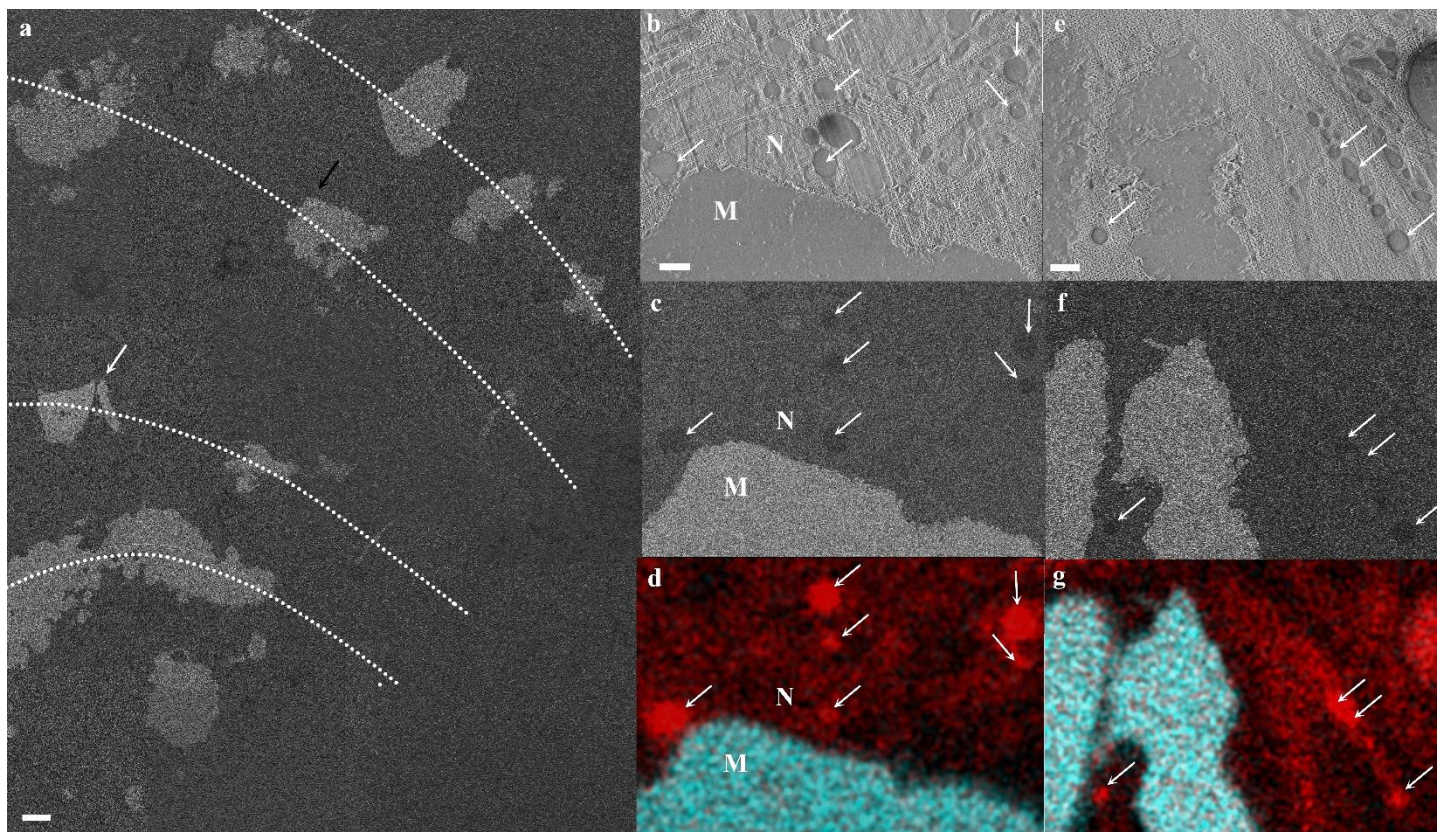

940  
941 **Fig. 5: Cryo-SEM/ EDS analysis of calicoblastic cells in a cryo-planed primary polyp.**

942 (a) An overview collage image composed of several high magnification cryo-SEM (ESB  
943 mode) micrographs stitched together, showing the cryo-planed surface along several septa  
944 (Dotted line resemble septa long axis) in a primary polyp. The mineral surfaces of the planed  
945 septa appear white and the coral soft tissues appear grey. (b-d) High magnification of locus  
946 pointed with black arrow in (a) (same area as in Fig. 4c) showing a cup shaped calicoblast  
947 attached to the mineral imaged in SE, ESB and EDS map respectively. (e-g) High  
948 magnification of locus pointed with white arrow in (a) showing filopodia in close proximity



949 with the mineral imaged in SE, ESB, and EDS maps respectively. Carbon rich vesicles are  
950 pointed with white arrows in (b)-(g) EDS maps show carbon (red) and calcium (turquoise)  
951 distributions. **M**- mineral, **N**- nucleus. Scale bars: (a)- 10  $\mu\text{m}$ , (b-g)- 1 $\mu\text{m}$ .

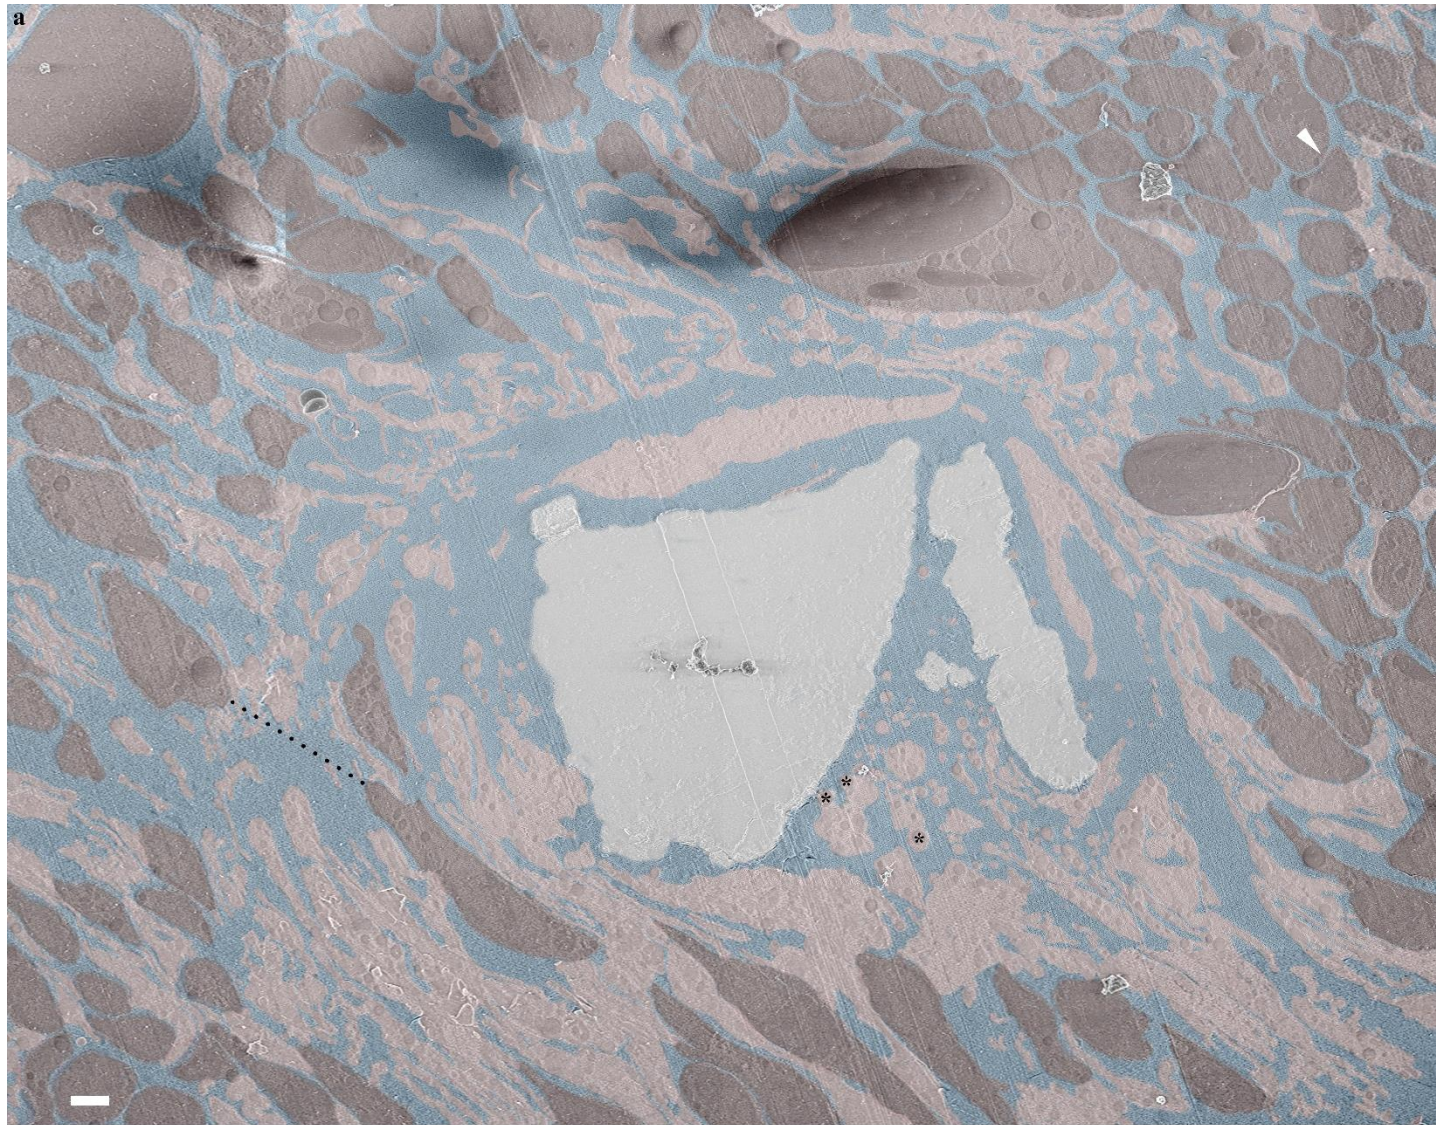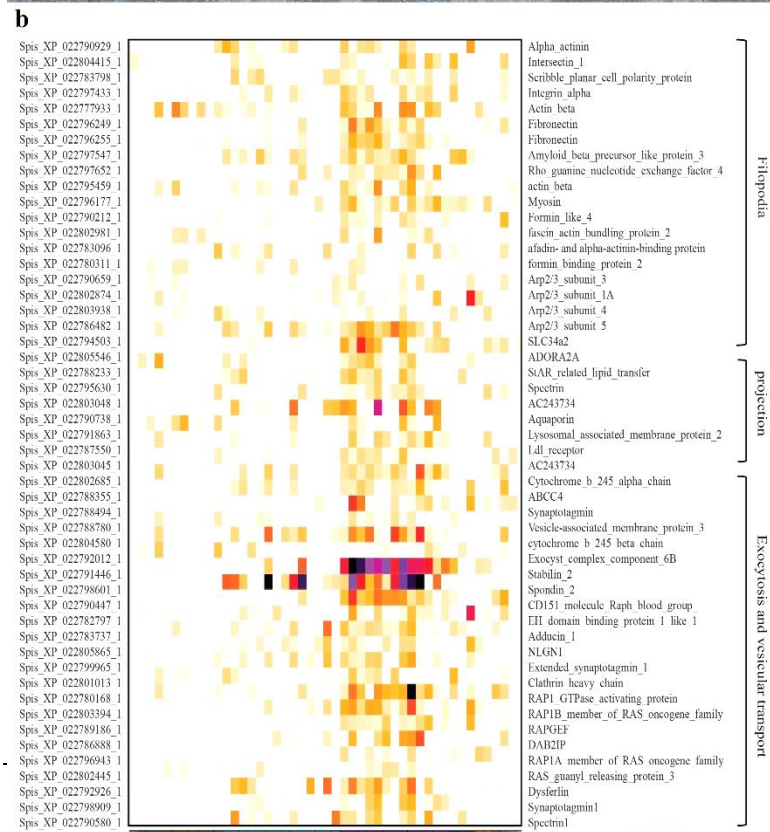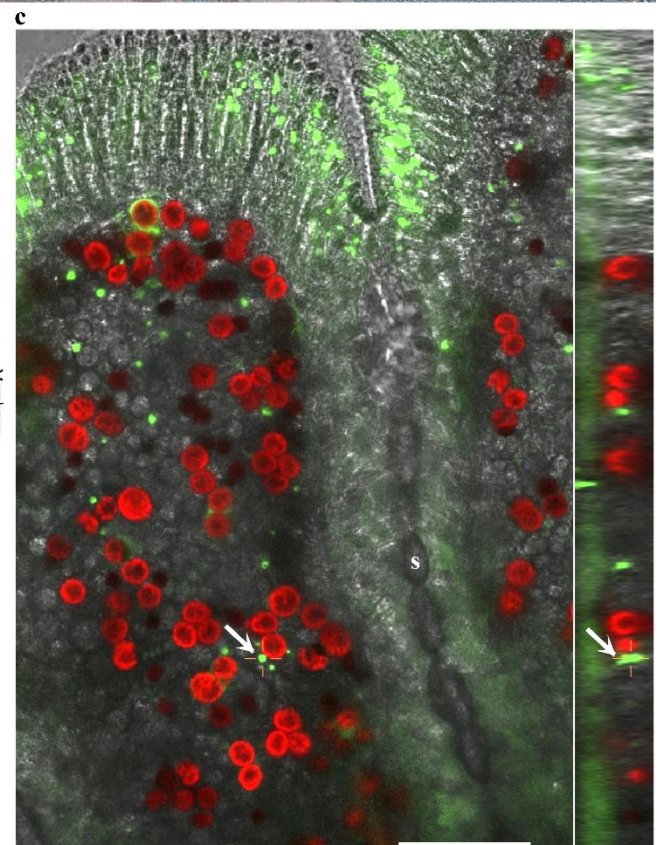

953 **Fig 6: The paracellular pathway in primary polyps.** (a) An overview image stitched from  
954 several high magnification cryo-SEM micrographs of the calicoblastic tissue around a  
955 septum in a cryo-planed primary polyp (same area as pointed with white arrow in Fig 5a).  
956 An area of tightly packed calicoblastic cells with paracellular space of 30 nm is pointed with  
957 white arrow head (top right corner). An area of dispersed cell packing with paracellular  
958 spacing of 8.4  $\mu\text{m}$  is denoted with black dashed line. Calicoblastic cell bodies are  
959 highlighted with pseudo-burgundy, filopodia in pseudo-pink, ECM in pseudo blue and the  
960 mineral in pseudo-grey. Three representative vesicles contained within the filopodia  
961 network are marked with black astrisks. Scale bar is 2  $\mu\text{m}$ . (b) Gene expression heatmap for  
962 selected genes involved in filopodia structure and function, membrane projections,  
963 exocytosis and vesicular transport, across all cell types of *S. pistillata* primary polyp based  
964 on the primary polyp scRNAseq published by Levy et al. (37). (c) In-vivo confocal laser  
965 scanning fluorescence image of the tissue around a septum (s) in a primary polyp labeled  
966 with green fluorescent beads of 1 $\mu\text{m}$  size. Fluorescence image is composed of three  
967 channels: Green- fluorescence beads, Red- symbionts auto-fluorescence and Grey scale-  
968 transmitted laser scanning image. Center large panel is one horizontal (xy) plane taken  
969 16 $\mu\text{m}$  above the glass bottom and found roughly in the middle of the z-stack data set that  
970 covers the entire thickness (30 $\mu\text{m}$ ) of the primary polyp tissue. Fluorescent beads in this  
971 image are incorporated inside the coral tissue. The right and the bottom panels show the two  
972 side views of the z-stack data set (i.e. xz, and yz). One representative green fluorescent bead  
973 is denoted with white arrow in all three panels.

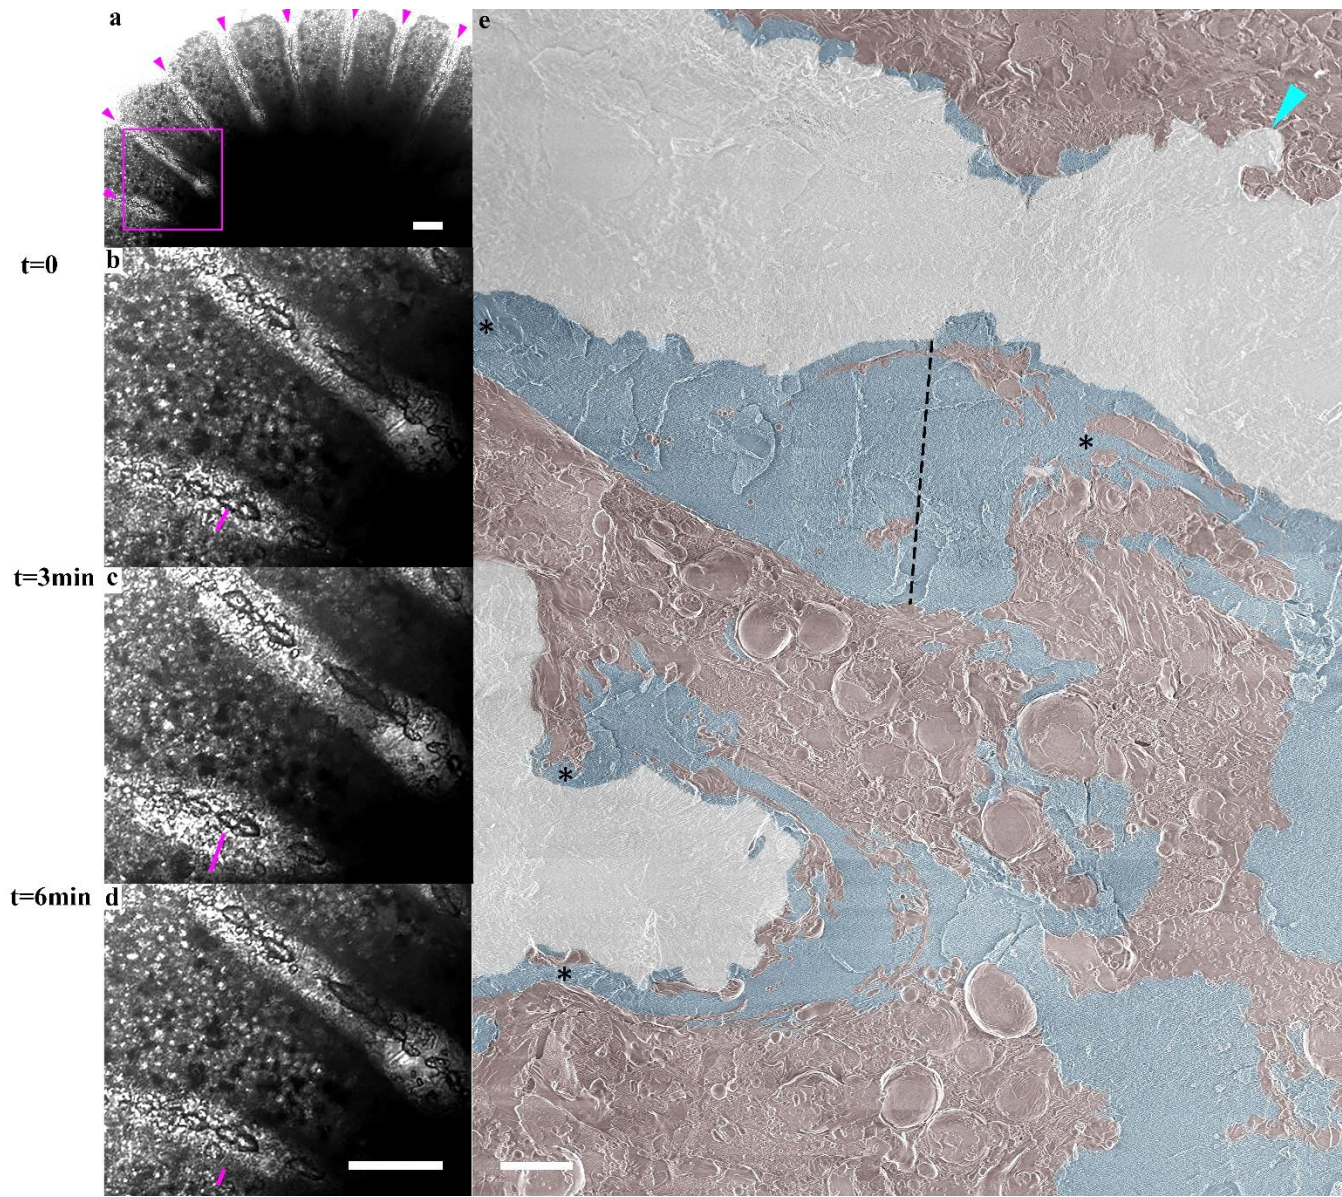

974  
975 **Fig. 7: ECM thickness variation along primary polyp septa.** a) Transmitted laser  
976 scanning in-vivo microscopy image of a primary polyp with forming septa denoted with  
977 magenta arrowheads recorded at t=0. (b)-(d) Higher magnification of the area marked with  
978 magenta square in (a) recorded at t=0, t=3 min and t=6 min respectively (see also  
979 supplementary video S3). The thickness of the ECM on the bottom side of one septum is  
980 marked with magenta line and equals 27  $\mu\text{m}$ , 43  $\mu\text{m}$  and 18  $\mu\text{m}$  respectively. (e) A collage  
981 of high resolution cryo-SEM micrographs stitched together to form an overview image  
982 of the a freeze-fractured septa of a primary polyp. Mineral surface is highlighted in pseudo-  
983 grey, the ECM in pseudo-blue, and the coral tissue including cell bodies and filopodia are  
984 highlighted in pseudo-burgundy. The thickness of the ECM layer in one 'ECM pocket' is  
985 depicted by dotted black line and equals- 38  $\mu\text{m}$ . Areas of ECM layer narrowing are pointed

986  
987

with asterisks. An area where tissue is closely attached to the mineral surface is pointed with turquoise arrowhead. Scale bars: (a-d): 100  $\mu\text{m}$ , (e): 10  $\mu\text{m}$ .

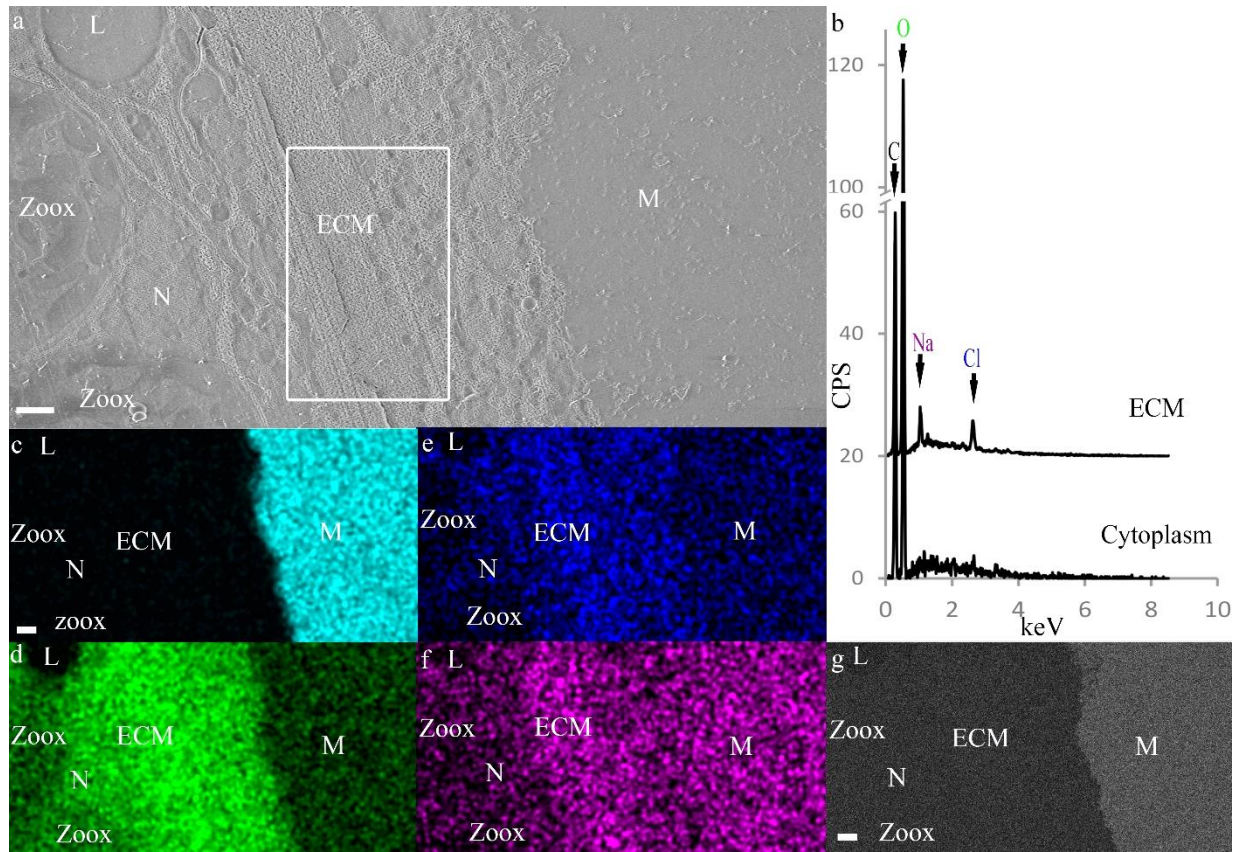

988

989

990

991

992

993

994

995

996

997

998

999

**Fig 7: Cryo-SEM/EDS analysis of the ECM.** (a) SE mode micrograph of the tissue-mineral interface. White rectangle marks ECM area enclosed between the mineral and the calcicoblastic layer. (b) Cryo-EDS spectra of the ECM (measured area is the area marked with white rectangle in (a)) and of the cytoplasm in a calcicoblastic cell. Identified elements are labeled in the graph. (c)-(f) Cryo-EDS elemental distribution maps of the same area of image (a) of the elements: Calcium (Cyan), oxygen (Green), chlorine (Blue) and sodium (Magenta) respectively. (g) Cryo-ESB micrograph of the same area as in (a)-(f). All scale bars are 1  $\mu\text{m}$ . M= Mineral, N= Nucleolus, Zoox= algal symbiont, L= Lipid body. CSP= counts per second.

1000

1001

1002

1003

1004

## Supplementary Materials

Fig S1: Expression heatmap of bicarbonate transporters and carbonic anhydrases genes across all cell types of *S. pistillata* primary polyp.

Fig. S2: Cryo-SEM micrographs of oral tissue characteristic cells in primary poly

Fig. S3: Cryo-SEM micrographs of nematocytes found in close proximity with the mineral.

1005 Video S4: In-vivo laser scanning confocal fluorescence microscopy time-lapse (6min) of  
1006 contraction and expansion movements of the tissue near the septa in a primary  
1007 polyp.  
1008

1009  
1010  
1011  
1012  
1013  
1014  
1015  
1016  
1017  
1018  
1019  
1020  
1021  
1022  
1023  
1024  
1025  
1026  
1027  
1028  
1029  
1030  
1031  
1032

**Supplementary Materials for**  
**The calcifying interface in a stony coral's primary polyp: An interplay**  
**between seawater and an extracellular calcifying space**

Gal Mor Khalifa\*, Shani Levy and Tali Mass\*

\* [galmor26@gmail.com](mailto:galmor26@gmail.com), [tmass@univ.haifa.ac.il](mailto:tmass@univ.haifa.ac.il)

**This PDF file includes:**

Fig S1 to S3

**Other Supplementary Materials for this manuscript include the following:**

Movie S4

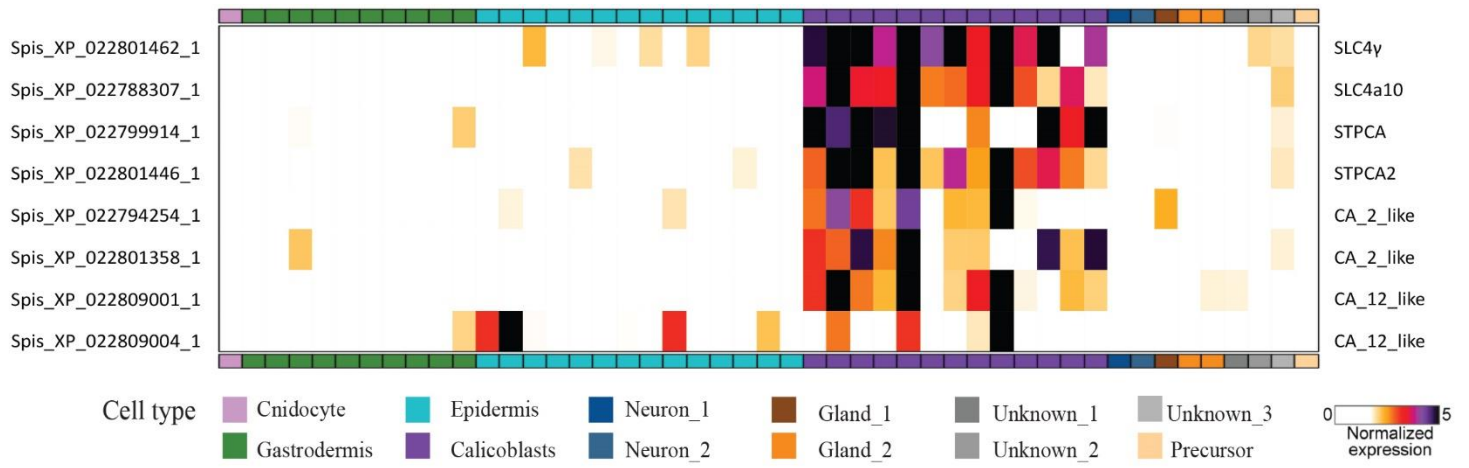

1033

1034

1035

1036

1037

1038

1039

**Fig. S1.**

**Expression heatmap of bicarbonate transporters and carbonic anhydrases genes across all cell types of *S. pistillata* primary polyp.** All genes represented in this heatmap are highly enriched in the calicoblasts cells (represented by purple in the X-axis). (From *S. pistillata* primary polyp scRNAseq analysis (80))



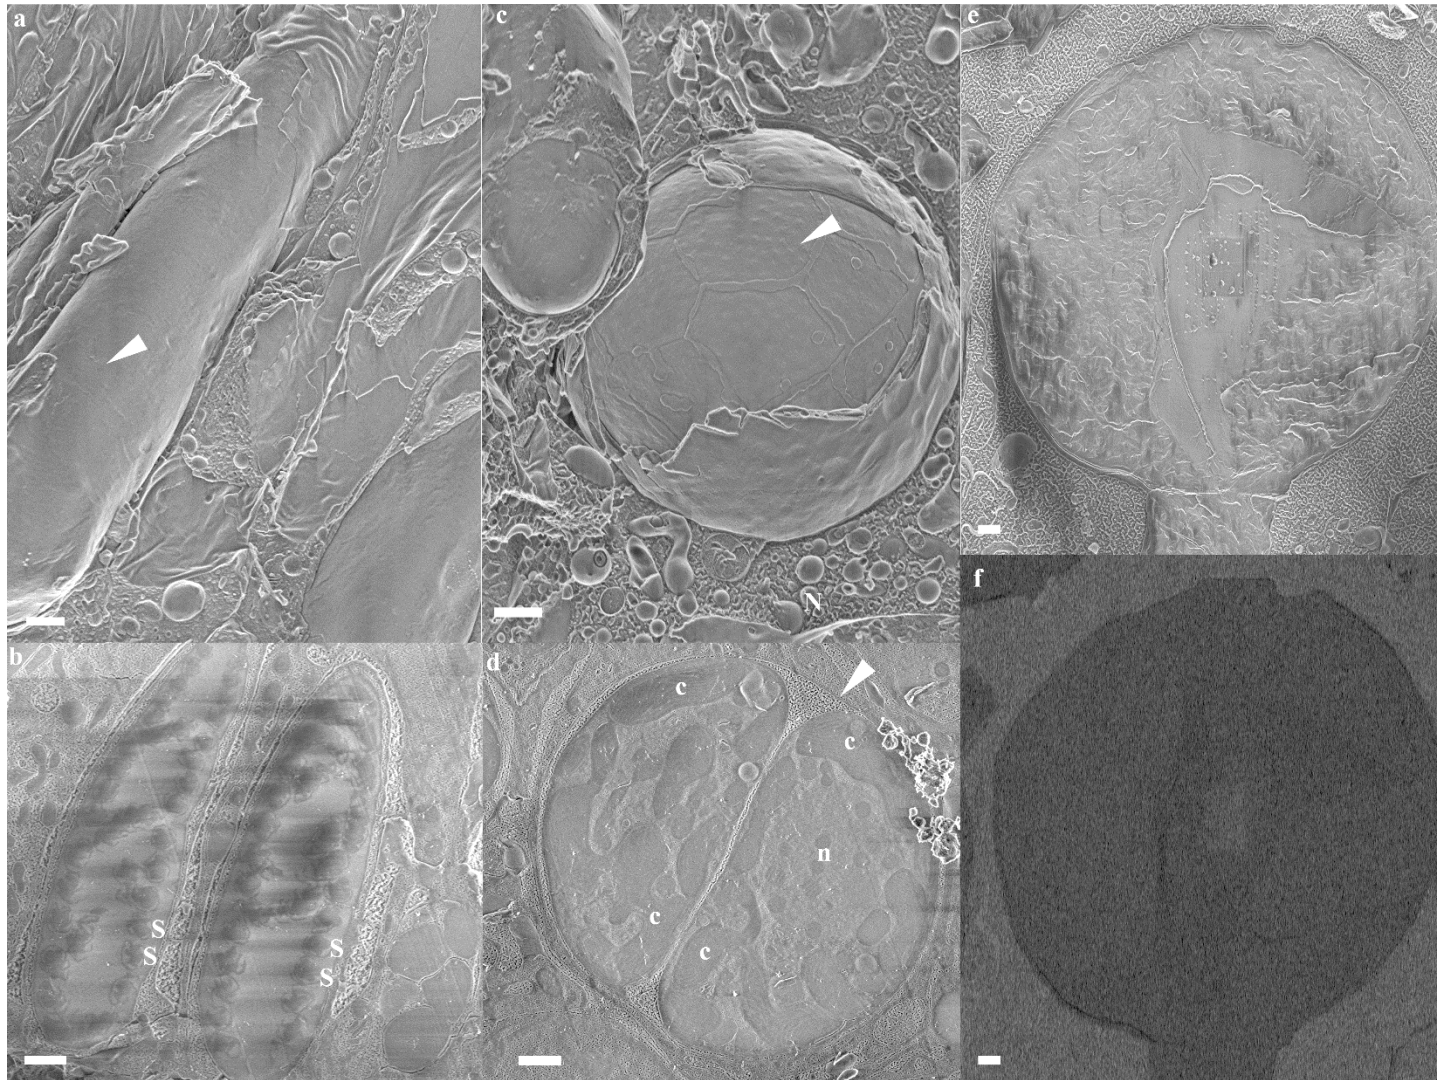

1040  
1041 **Fig. S2: Cryo-SEM micrographs of oral tissue characteristic cells in primary polyps.** (a)  
1042 Nematocyte (white arrow head) imaged in a freeze fractured specimen (SE mode). (b)  
1043 Two elliptical shaped nematocytes imaged in cryo-planed primary polyp (SE mode), each of them  
1044 containing about 30 undischarged spiny tubules (stenotele), two representative stenotele are  
1045 depicted in each cell. (c) Symbiotic algal cell imaged in a freeze-fractured primary polyp (SE  
1046 mode) theca imprint on the cell outer surface are depicted with white arrowhead. (d) Dividing  
1047 symbiotic algal cells within the coral host cell imaged in a cryo-planed primary polyp (SE  
1048 mode). Host cell membrane depicted with white arrowhead. (e) A round shaped mucus cell  
1049 imaged in a cryo-planed primary polp (SE mode) (f) the same image as (e) imaged in ESB  
1050 mode, with bulk mucus cell content appear dark compared with its environment due to its  
1051 organic content. All scale bars are 1µ m S- stenotele, c- chloroplasts, n-symbiont cell  
1052 nucleolus.  
1053

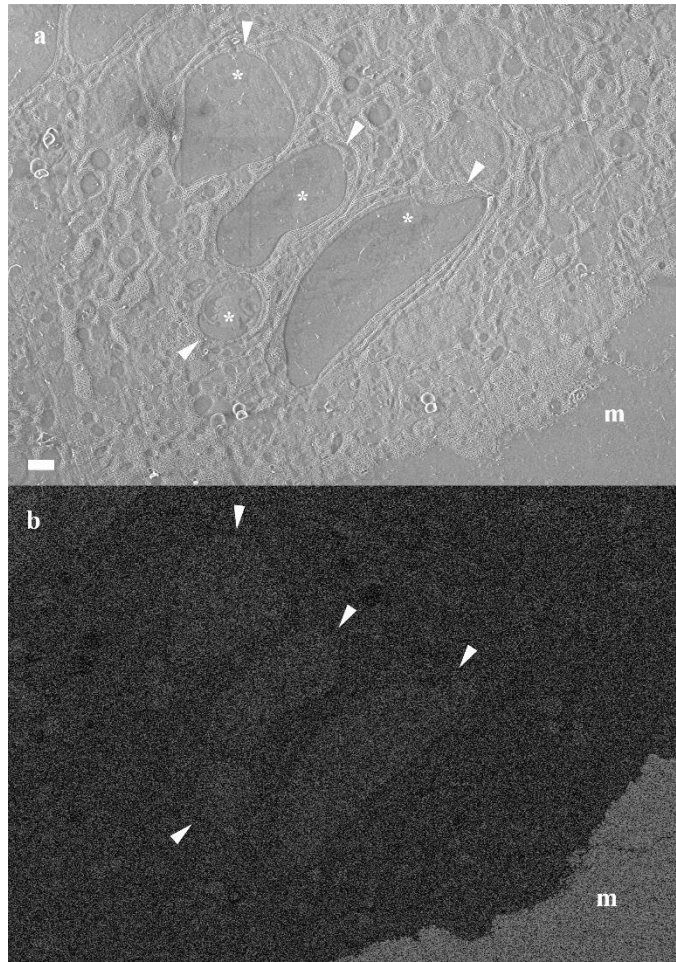

1054

1055

1056

1057

1058

**Fig. S3: Cryo-SEM micrographs of nematocytes found in close proximity with the mineral.** (a) SE mode. (b) ESB mode. Nematocytes are denoted with white arrowheads. Stenotele are marked with asterisk in image (a). **m**-mineral.

1059

1060

1061

1062

1063

1064

1065

1066

**Movie S4: In-vivo laser scanning confocal fluorescence microscopy time-lapse (6min) of contraction and expansion movements of the tissue near the septa in a primary polyp labeled with green fluorescent beads of 1  $\mu\text{m}$  diameter.** The fluorescence images are composed of three overlaid channels: Green- fluorescence 1  $\mu\text{m}$  sized beads, Red- symbionts auto-fluorescence and Grey scale- transmitted laser scanning image. A pumping movement is documented, created by contraction and extension of the ECM layer along all forming septa.
